1  
2  
3  
4  
5  
6  
7  
8  
9  
10  
11  
12  
13  
14  
15  
16  
17  
18  
19  
20  
21  
22  
23

**KDM6A/UTX promotes spermatogenic gene expression across generations but is dispensable for male fertility**

Benjamin William Walters<sup>1</sup>, Shannon R Rainsford<sup>1</sup>, Nicolas Dias<sup>1</sup>, Xiaofang Huang<sup>2</sup>, Dirk G de Rooij<sup>3</sup>, Bluma J Lesch<sup>1,4\*</sup>

<sup>1</sup>Department of Genetics, Yale School of Medicine, New Haven, CT 06510 USA

<sup>2</sup>Department of Cellular and Molecular Physiology, Yale School of Medicine, New Haven, CT 06510 USA

<sup>3</sup>Reproductive Biology Group, Division of Developmental Biology, Dept. of Biology, Faculty of Science, Utrecht University, Utrecht 3584 CH, The Netherlands; Center for Reproductive Medicine, Academic Medical Center, University of Amsterdam, Amsterdam 1105 AZ, The Netherlands.

<sup>4</sup>Yale Cancer Center, Yale School of Medicine, New Haven, CT 06510 USA

\*correspondence: [bluma.lesch@yale.edu](mailto:bluma.lesch@yale.edu)

## 24 **Abstract**

25 Paternal chromatin undergoes extensive structural and epigenetic changes during mammalian  
26 spermatogenesis, producing sperm that contain an epigenome optimal for the transition to  
27 embryogenesis. Histone modifiers play an important role in this process by encoding specialized  
28 regulatory information in the sperm epigenome. Lysine demethylase 6a (KDM6A) promotes gene  
29 activation via demethylation of H3K27me<sub>3</sub>, a developmentally important repressive modification  
30 abundant throughout the epigenome of sperm and embryonic stem cells. Despite its  
31 developmental importance in pluripotent cells and germ cell progenitors, the function of KDM6A  
32 during spermatogenesis has not been described. Here, we show that *Kdm6a* is transiently  
33 expressed in the male germline in late spermatogonia and during the early stages of meiotic entry.  
34 Deletion of *Kdm6a* in the male mouse germline (*Kdm6a* cKO) yielded a modest increase in sperm  
35 head defects but did not affect fertility or the overall progression of spermatogenesis. However,  
36 hundreds of genes were deregulated upon loss of *Kdm6a* in spermatogenic cells and in an  
37 immortalized spermatogonia cell line (GC-1 spg) with a strong bias towards downregulation.  
38 Single cell RNA-seq revealed that most of these genes were deregulated in spermatogenic cells  
39 at the same stage when *Kdm6a* is expressed and encode epigenetic factors involved in chromatin  
40 organization and modification. A subset of these genes was persistently deregulated in the male  
41 germ line across two generations of offspring of *Kdm6a* cKO males. Our findings highlight KDM6A  
42 as a transcriptional activator in the mammalian male germline that is dispensable for  
43 spermatogenesis but important for safeguarding gene regulatory state intergenerationally.

44

## 45 **Author summary**

46 Offspring viability and fitness relies upon the development of functional sperm and the integrity of  
47 information that they carry. Chromatin is modified and remodeled extensively throughout  
48 spermatogenesis to facilitate meiosis, DNA compaction, and to encode gene regulatory  
49 information for the next generation. In mice, a paternal germline lacking KDM6A, a histone  
50 modifier, yields offspring with reduced lifespans and increased cancer risk. How KDM6A functions  
51 in the paternal germline to support offspring health is unknown. Here, we show that *Kdm6a*  
52 expression is limited to a distinct developmental interval when differentiated spermatogonia  
53 transition from mitosis to meiosis. During this timepoint, KDM6A acts as a transcriptional activator  
54 for hundreds of genes, many of which encode meiotic factors and epigenetic modifiers.  
55 Nevertheless, this activity is dispensable for overall spermatogenesis and fertility. Surprisingly,  
56 we find a significant overlap in germline transcriptomes of *Kdm6a* cKO mice and wildtype  
57 offspring. We propose that KDM6A encodes gene regulatory information in the male germline that  
58 is retained across generations.

59

60

## 61 **Introduction**

62 Chromatin states are a major determinant of gene expression. Posttranslational histone  
63 modifications play a central role in defining and regulating chromatin state, and histone modifying  
64 enzymes are critical factors in guiding gene expression programs. The importance of histone  
65 modification dynamics is particularly evident in spermatogenesis, when chromatin is dramatically  
66 remodeled and modified to facilitate precise temporal gene expression programs and to generate  
67 a viable epigenome for the next generation. One of the best characterized histone modifications  
68 in the male germline is trimethylation of histone H3 at lysine 27 (H3K27me<sub>3</sub>), which is catalyzed  
69 by the Polycomb repressive complex 2 (PRC2) (1, 2). Extensive studies in multiple cell types point  
70 to a role for PRC2 and H3K27me<sub>3</sub> in limiting promiscuous gene expression. Notably, H3K27me<sub>3</sub>  
71 is enriched at genes encoding developmental regulators in mouse embryonic stem cells and has  
72 been shown to support ground-state pluripotency (3, 4). In male germ cells, loss of PRC2 leads  
73 to derepression of somatic and stage-specific meiosis genes and ultimately causes sterility (5).  
74 H3K27me<sub>3</sub> is also one of the two histone modifications that define bivalency, a unique chromatin  
75 state specified by co-occupancy of H3K27me<sub>3</sub> and the activation mark H3K4me<sub>3</sub> and thought to  
76 poise repressed germline genes for later activation in the developing embryo. Several studies  
77 have linked paternally-derived H3K27me<sub>3</sub> epimutations with detrimental developmental  
78 consequences in offspring (6-9). Therefore, modulation of the levels and distribution of  
79 H3K27me<sub>3</sub> in the male germline is critical for fertility and for facilitating appropriate offspring  
80 development.

81 The X-linked gene *Kdm6a* (also known as *Utx*) counterbalances PRC2 activity by  
82 demethylating H3K27me<sub>2/3</sub> to derepress genes and promote transcription (10). KDM6A was  
83 initially described as a critical developmental factor in *C. elegans* and zebrafish through its  
84 regulation of Hox gene activity (11, 12). KDM6A has since been shown to play important roles in  
85 diverse cellular processes, including embryonic stem cell differentiation, aging, cellular  
86 reprogramming and cellular development (13-22). KDM6A also has non-catalytic activity in  
87 regulation of enhancer activation via association with the MLL3/4 complex (37). In aggregate,

88 existing data highlight KDM6A as an important transcriptional regulator with complex roles in the  
89 establishment of gene expression programs.

90 In addition to its role in development, missense and truncating mutations in *KDM6A* have  
91 been identified across a broad range of human cancers, suggestive of a function for KDM6A as  
92 a tumor suppressor (23). Loss of *Kdm6a* in the mouse paternal germline potentiates cancer risk  
93 in genetically wildtype offspring, implying that some of the tumor suppressive epigenetic effects  
94 of KDM6A are heritable (8). This phenotype suggests a model in which KDM6A primes the sperm  
95 epigenome with gene regulatory information that limits malignant transformation. How KDM6A  
96 functions across spermatogenesis in the parental germline to confer these effects in the next  
97 generation is not fully understood.

98 In this study, we investigate the function of KDM6A in the male germline, with a particular  
99 focus to understanding its effects on gene regulation during spermatogenesis. We show that  
100 *Kdm6a* expression is limited to late spermatogonia and the early stages of meiotic prophase, in  
101 contrast to the broad expression of most histone demethylase genes during spermatogenesis.  
102 KDM6A acts as a transcriptional activator predominantly during these early stages of meiosis,  
103 where it targets genes encoding chromatin remodelers and regulators of chromosome  
104 organization, among others. KDM6A mildly impacts chromatin accessibility and does not alter  
105 global H3K27me3 levels, suggesting that KDM6A may act primarily via alternative mechanisms  
106 in the male germline. Despite its effects on gene expression, loss of *Kdm6a* did not overtly impact  
107 the progression of spermatogenesis, although it did cause a mild increase in sperm head defects.  
108 Intriguingly, we identified a subset of genes positively regulated by KDM6A that were persistently  
109 deregulated in the testes of wildtype offspring of *Kdm6a* cKO males. Overall, our data support a  
110 model in which KDM6A resets gene regulatory information in the male germline that is not  
111 essential for fertility but can affect gene expression across generations.

112

113



## 114 Results

### 115 **KDM6A is transiently enriched in primordial germ cells and in spermatogenic cells at** 116 **meiotic entry**

117 Although *Kdm6a* is reported to be ubiquitously expressed in mice, including in reproductive  
118 organs (24), its expression pattern across gonad development and adult spermatogenesis has  
119 not been carefully defined. To broadly address this question, we first measured the abundance of  
120 *Kdm6a* transcripts using bulk RNA sequencing at three time points in post-migratory primordial  
121 germ cells (PGCs) (25), and in enriched populations of meiotic (pachytene spermatocyte) and  
122 post-meiotic (round spermatid) cells, as well as whole testes. Expression of *Kdm6a* was  
123 detectable in all samples but was most enriched in PGCs relative to adult male germ cells (**Fig**  
124 **1A**). The enrichment of *Kdm6a* transcript in PGCs is consistent with a previous report implicating  
125 KDM6A as a regulator of epigenetic reprogramming in PGCs (17). *Kdm6a* transcript levels were  
126 higher in whole adult testis compared to either pachytene spermatocytes or round spermatids. A  
127 similar trend was evident at the protein level, where Western blotting revealed moderate KDM6A  
128 protein expression in whole testis that was reduced in post-meiotic cells and almost undetectable  
129 in meiotic cells (**Fig 1B**), suggesting that a population of testicular somatic cells or pre-pachytene  
130 germ cells expresses *Kdm6a* at a level higher than either pachytene spermatocytes or round  
131 spermatids. Supporting this hypothesis, *Kdm6a* transcript levels were significantly higher in an  
132 immortalized spermatogonia-derived cell line (GC-1 spg, hereafter called GC1s) (26) relative to  
133 PGCs, whole adult testis, pachytene spermatocytes and round spermatids (**Fig 1A**).

134 To more precisely identify the cell type with strongest *Kdm6a* expression in adult testes,  
135 we generated a single cell RNA-seq (scRNA-seq) dataset from adult mouse testis and examined  
136 the dynamics of *Kdm6a* gene expression across spermatogenic development. Graph-based  
137 clustering using Seurat (27) defined seventeen distinct clusters representing the known trajectory  
138 of spermatogenic maturation along with most testicular somatic cell types, with the exception of  
139 Sertoli cells (**Fig 1C, S1A and S1B**). Consistent with our bulk RNA and protein data, *Kdm6a*

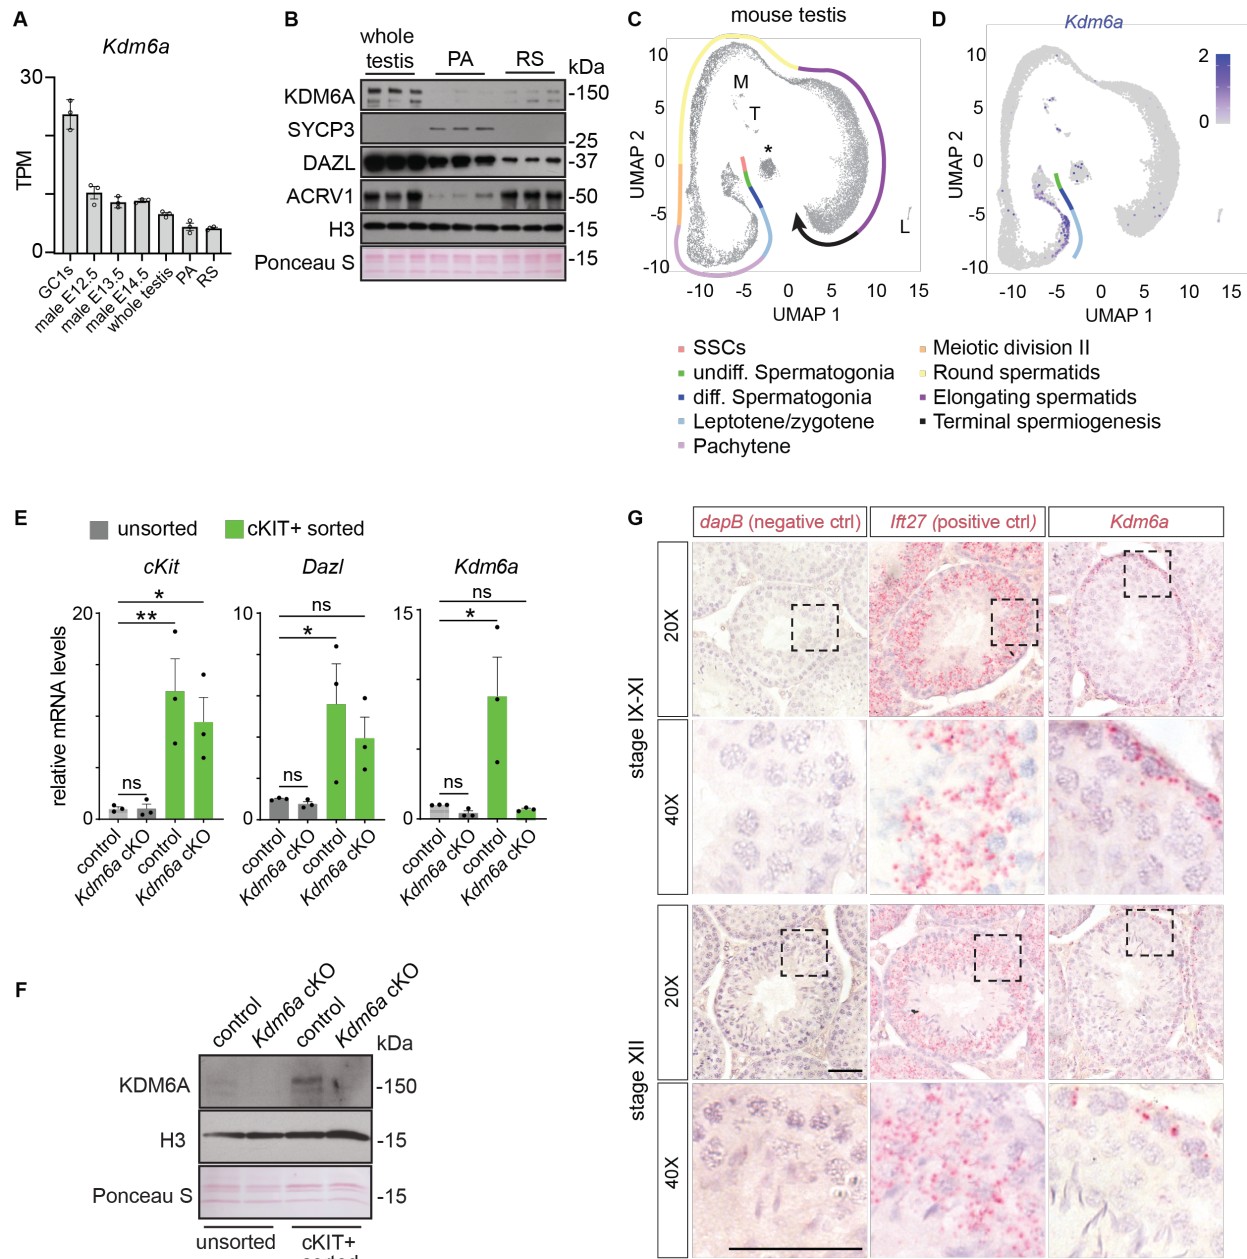

**Fig 1. Expression analysis of KDM6A in the male germline.** (A) Transcripts per million (TPM) for *Kdm6a* in the GC1-SPG cell line, primordial germ cells, whole adult testis, pachytene-enriched (PA) and round spermatid-enriched (RS) male germ cells. (B) Western blotting in male germ cells for KDM6A and markers of meiotic (SYCP3) and post-meiotic (ACRV1) cells. DAZL is as a broad male germ cell marker and histone H3 is as a loading control. (C) UMAP of single cell RNA-seq (scRNA-seq) data from whole mouse testis. Distinct cell populations are indicated by the colored line. M = macrophages, T = telocytes, L = Leydig cells, \* = unassigned. (D) UMAP showing the expression pattern of *Kdm6a* across testis cell populations detected by scRNA-seq. (E) RT-qPCR in unsorted and cKIT+ sorted cells derived from testes of control and *Kdm6a* cKO mice. ns = not significant, \*p ≤ 0.05, \*\*p ≤ 0.01. (F) Western blotting for KDM6A in unsorted and cKIT+ sorted cells derived from testes of control and *Kdm6a* cKO mice. (G) Brightfield micrographs showing in situ hybridization for the indicated transcript (pink) in tissue sections of seminiferous tubules co-stained with hematoxylin. Dashed boxes indicate the regions captured at high magnification below. Scale bar = 50µm.

140

141 expression was not uniform across testicular cell types. *Kdm6a* was highly expressed in several

142 somatic cell populations, including macrophages, Leydig cells and telocytes (Fig 1D). Among

143 germ cells, *Kdm6a* mRNA expression was almost exclusive to a defined developmental interval

144 encompassing late spermatogonia and the early stages of meiotic prophase. *Kdm6a* transcripts

145 were most abundant in intermediate/spermatogonia B, differentiated spermatogonia, and  
146 leptotene/zygotene spermatocytes. We confirmed this expression profile with publicly available  
147 scRNA-seq datasets from mouse (28) and human (29) (**Fig S1C and S1D**). To validate this  
148 expression pattern, we enriched for late spermatogonia/early meiotic prophase germ cells from  
149 whole testes by flow cytometry for cKIT<sup>+</sup> cells (**Fig S1D**) (30) and performed RT-qPCR and  
150 Western blotting for *Kdm6a*. We confirmed a strong enrichment for *Kdm6a* mRNA and protein  
151 relative to unsorted cells and cKIT<sup>+</sup> cells isolated from testes of a *Kdm6a* germline conditional  
152 knockout (cKO, see next section) (**Fig 1E and 1F**). Further confirming this expression pattern, in  
153 situ hybridization revealed an enrichment for *Kdm6a* transcript in the basal compartment of the  
154 seminiferous tubule where spermatogonia and early meiotic cell populations reside (**Fig 1G and**  
155 **Fig S1E**). This was particularly evident in tubules at stage IX-XII of the spermatogenic cycle.

156 *Kdm6a* has two homologs in the mouse genome, *Uty* and *Kdm6b*. We queried our scRNA-  
157 seq dataset to see if *Uty* and *Kdm6b* had similar gene expression patterns to *Kdm6a*. *Uty* was  
158 weakly expressed in undifferentiated spermatogonia and early meiotic cells while *Kdm6b*  
159 expression was generally enriched in spermatogonia, implying that both homologs are expressed  
160 in overlapping but not identical cell populations compared to *Kdm6a* in the adult mouse testis (**Fig**  
161 **S1F**). To determine if the expression pattern of *Kdm6a* is unique among histone demethylase  
162 genes, we also assessed the expression patterns of eighteen other lysine demethylases using  
163 our scRNA-seq data. Seven lysine demethylases exhibited broad expression patterns across  
164 spermatogenesis, while eleven exhibited stage-specific expression profiles that did not fully  
165 overlap with *Kdm6a* (**Fig S1D**). The expression pattern of *Kdm7b* was most similar to *Kdm6a*  
166 during early spermatogenesis but was also detectable in round spermatids. Interestingly, *Kdm7b*  
167 can demethylate mono- and di-methylated, but not tri-methylated H3K27 (31), implying that  
168 *Kdm6a* and *Kdm7b* may have complementary, non-redundant functions during spermatogenesis.  
169 Overall, *Kdm6a* has a unique and transient expression pattern during spermatogenesis.

170 Together, these data demonstrate that contrary to previous assumptions, *Kdm6a* is not  
171 ubiquitously expressed in spermatogenesis. KDM6A is temporally regulated during

172 spermatogenesis and is most strongly expressed from late stages of spermatogonial  
173 differentiation to the earliest stages of meiotic prophase, indicating a potential function for KDM6A  
174 during meiotic entry.

175

### 176 ***Kdm6a* is dispensable for spermatogenesis**

177 To evaluate the function of KDM6A in spermatogenesis, we generated mice lacking *Kdm6a*  
178 specifically in germ cells. These mice carry a conditional allele of *Kdm6a* (22) along with the  
179 germline-specific *Ddx4-Cre* (32), resulting in deletion of the third *Kdm6a* exon and yielding a  
180 truncated non-functional protein specifically in the germline. In *Kdm6a* cKO males, *Kdm6a*  
181 transcript and protein expression was significantly decreased in cKIT<sup>+</sup> cells and whole testis  
182 lysates compared to control, confirming the efficacy of the knockout (**Fig 1E, 1F and S2A**). There  
183 was no change in the transcript levels of *Uty*, *Kdm6b*, or *Kdm7b*, in *Kdm6a* cKO testes, indicating  
184 that KDM6A homologs are not compensating for *Kdm6a* loss at the transcript level (**Fig S2B**).

185 We next asked if *Kdm6a* loss in the male germ line caused any phenotypic abnormalities.  
186 Males from our *Kdm6a* cKO mouse line were previously shown to be normally fertile based on  
187 number of offspring (8). We found that *Kdm6a* cKO testes were comparable in weight and size to  
188 control mice when normalized to body weight (**Fig 2A and 2B**). Histologically, all major  
189 spermatogenic cell types were present and morphologically normal in *Kdm6a* cKO seminiferous  
190 tubules (**Fig 2C**). Overall protein levels and spatiotemporal expression of markers for  
191 spermatogonia (LIN28, SALL4, STRA8 and CHD4), spermatocytes (SYCP3) and general  
192 spermatogenic cells (DAZL) were also comparable between control and *Kdm6a* cKO testes (**Fig**  
193 **2D and 2E**). Gamma-H2AX, a phosphorylated histone variant induced at sites of DNA damage  
194 and involved in meiotic recombination, meiotic sex chromosome inactivation and meiotic silencing  
195 of unsynapsed chromatin, also exhibited similar cellular distribution patterns and global levels in  
196 *Kdm6a* cKO testes relative to control (**Fig 2E and 2F**), implying that these processes progress  
197 normally in the absence of KDM6A.



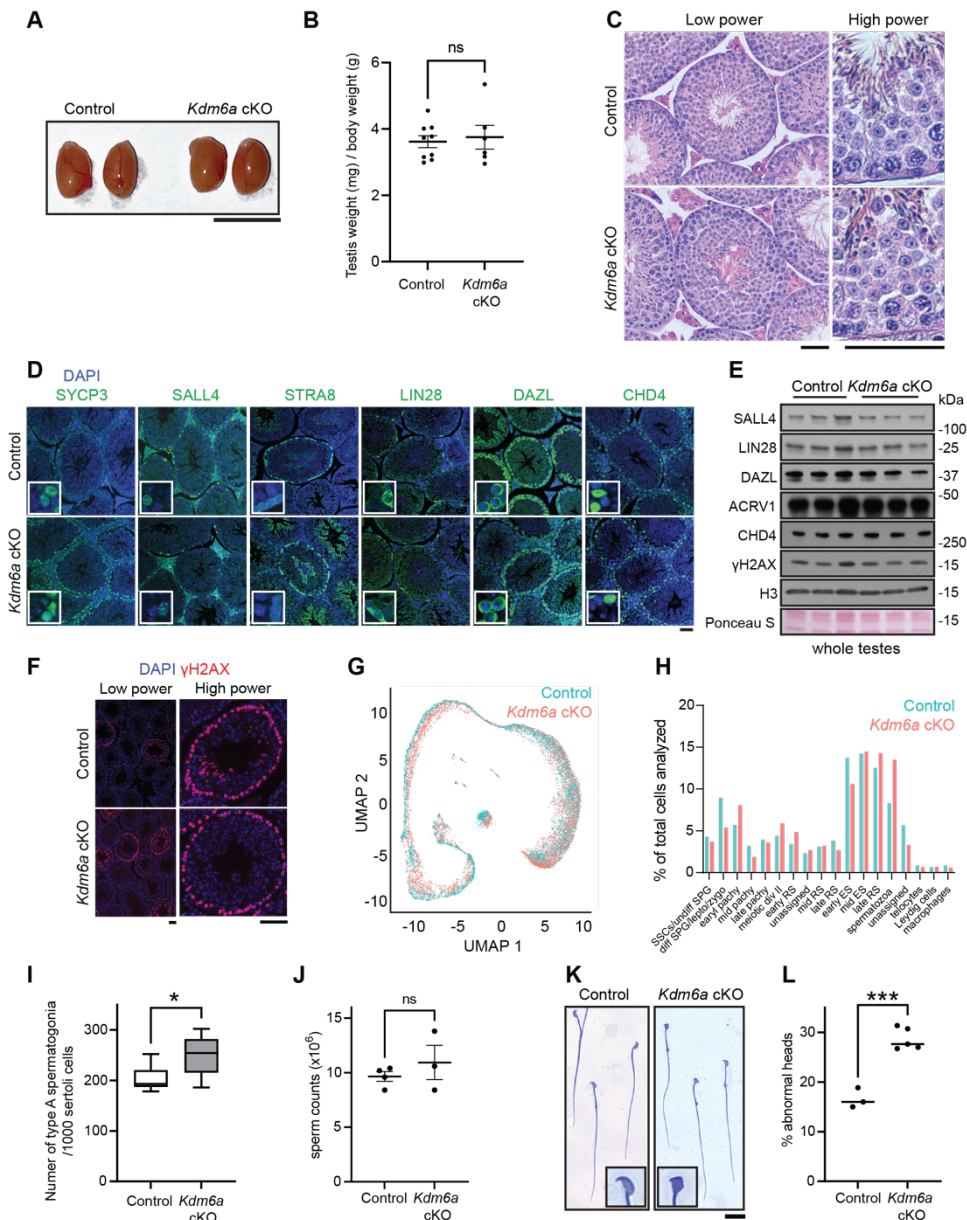

**Fig 2. Minimal impact on spermatogenesis in *Kdm6a* cKO mice.** (A) Gross morphology of testes from a control and a *Kdm6a* cKO mouse. Scale bar = 1 cm. (B) Testis weights from control and *Kdm6a* cKO mice normalized to body weight. (C) Cross-sections of control and *Kdm6a* cKO seminiferous tubules stained with hematoxylin and eosin. Scale bars = 50 μm. (D) Control and *Kdm6a* cKO testis sections immunostained (green) for spermatogonia markers (LIN28A, STRA8, CHD4, and SALL4), a spermatocyte marker (SYCP3), and a broad germ cell marker (DAZL) as well as DAPI to stain DNA (blue). Scale bar = 50 μm. (E) Whole lysates from control and *Kdm6a* cKO testes (n = 3) immunoblotted for spermatogonia markers (LIN28A, SALL4 and CHD4), a round spermatid marker (ACRV1), and a marker for meiotic progression (γH2AX). Histone H3 and ponceau S serve as loading controls. (F) Immunofluorescence staining (red) for γH2AX in seminiferous tubules of control and *Kdm6a* cKO mice. (G) UMAP of single cell RNA-seq data from control (blue) and *Kdm6a* cKO testis (pink). (H) The percentage of cells classified into each cluster out of total cells profiled in control and *Kdm6a* cKO scRNA-seq datasets. (I) Quantification of type A spermatogonia by visual examination of testes sections stained with hematoxylin and eosin. (J) Epididymal sperm counts after swim-out in control and *Kdm6a* cKO mice. (K) Coomassie-stained spermatozoa from control and *Kdm6a* cKO cauda epididymides. Scale bar = 20 μm. (L) Manual blinded quantification of abnormal heads detected by brightfield microscopy of Coomassie-stained sperm from control and *Kdm6a* cKO mice.

198 We next generated an scRNA-seq dataset from *Kdm6a* cKO testes and asked if *Kdm6a*  
 199 loss leads to changes in the relative numbers of specific spermatogenic cell types compared to  
 200 our control data set (see Fig 1C). We found similar proportions of all cell types between control

201 and *Kdm6a* cKO testes (**Fig 2G and 2H**). No significant difference in the number of preleptotene  
202 spermatocytes was detected by manual counting in hematoxylin and eosin stained testis sections  
203 (**Fig S2C**). We did detect a statistically significant but very modest increase in the numbers of  
204 type A spermatogonia in *Kdm6a* cKO testis sections relative to control (**Fig 2I**).

205 Finally, we explored the possibility that loss of *Kdm6a* affects spermiogenesis and alters  
206 the form or function of mature spermatozoa. The number of sperm in the cauda epididymides  
207 were unaffected (**Fig 2J**). There was a modest but statistically significant increase in the fraction  
208 of *Kdm6a* cKO sperm that exhibited triangular shaped head defects (29%) relative to control  
209 (17%, **Fig 2K and 2I**). No motility defect was detected in *Kdm6a* cKO sperm under uncapacitated  
210 or capacitated conditions using computer-assisted semen analysis (CASA, **Fig S2D**).

211 We conclude that there is no meaningful spermatogenesis defect in *Kdm6a* cKO mice and  
212 that KDM6A is dispensable for sperm production and fertility.

213

#### 214 **KDM6A does not significantly impact chromatin accessibility in spermatogonia**

215 KDM6A has been shown to regulate chromatin accessibility in several mammalian cell types,  
216 primarily through H3K27me3-independent mechanisms (33-35). We asked if KDM6A similarly  
217 contributes to chromatin remodeling in the male germline. Western blotting in subcellular fractions  
218 of whole testis confirmed that as expected, KDM6A protein is predominantly nuclear, indicating  
219 that the bulk of its activity is likely directed towards chromatin targets in the male germ line (**Fig**  
220 **S3A**). We therefore interrogated genome-wide changes in chromatin accessibility provoked by  
221 KDM6A loss in the male germline by performing ATAC-seq in sorted cKIT<sup>+</sup> cells from *Kdm6a*  
222 cKO and control mice. The average number of peaks called was similar between control (n =  
223 26,184) and *Kdm6a* cKO samples (n = 24,671). Peak overlap between replicates was high for  
224 both control and *Kdm6a* cKO samples, although there was more difference between cKO samples  
225 likely owing to variabilities inherent in cell sorting procedures (**Fig 3A, S1 Dataset**). Strong ATAC-  
226 seq peaks were predominantly identified at gene promoters as expected (**Fig S3B, S3C, and**

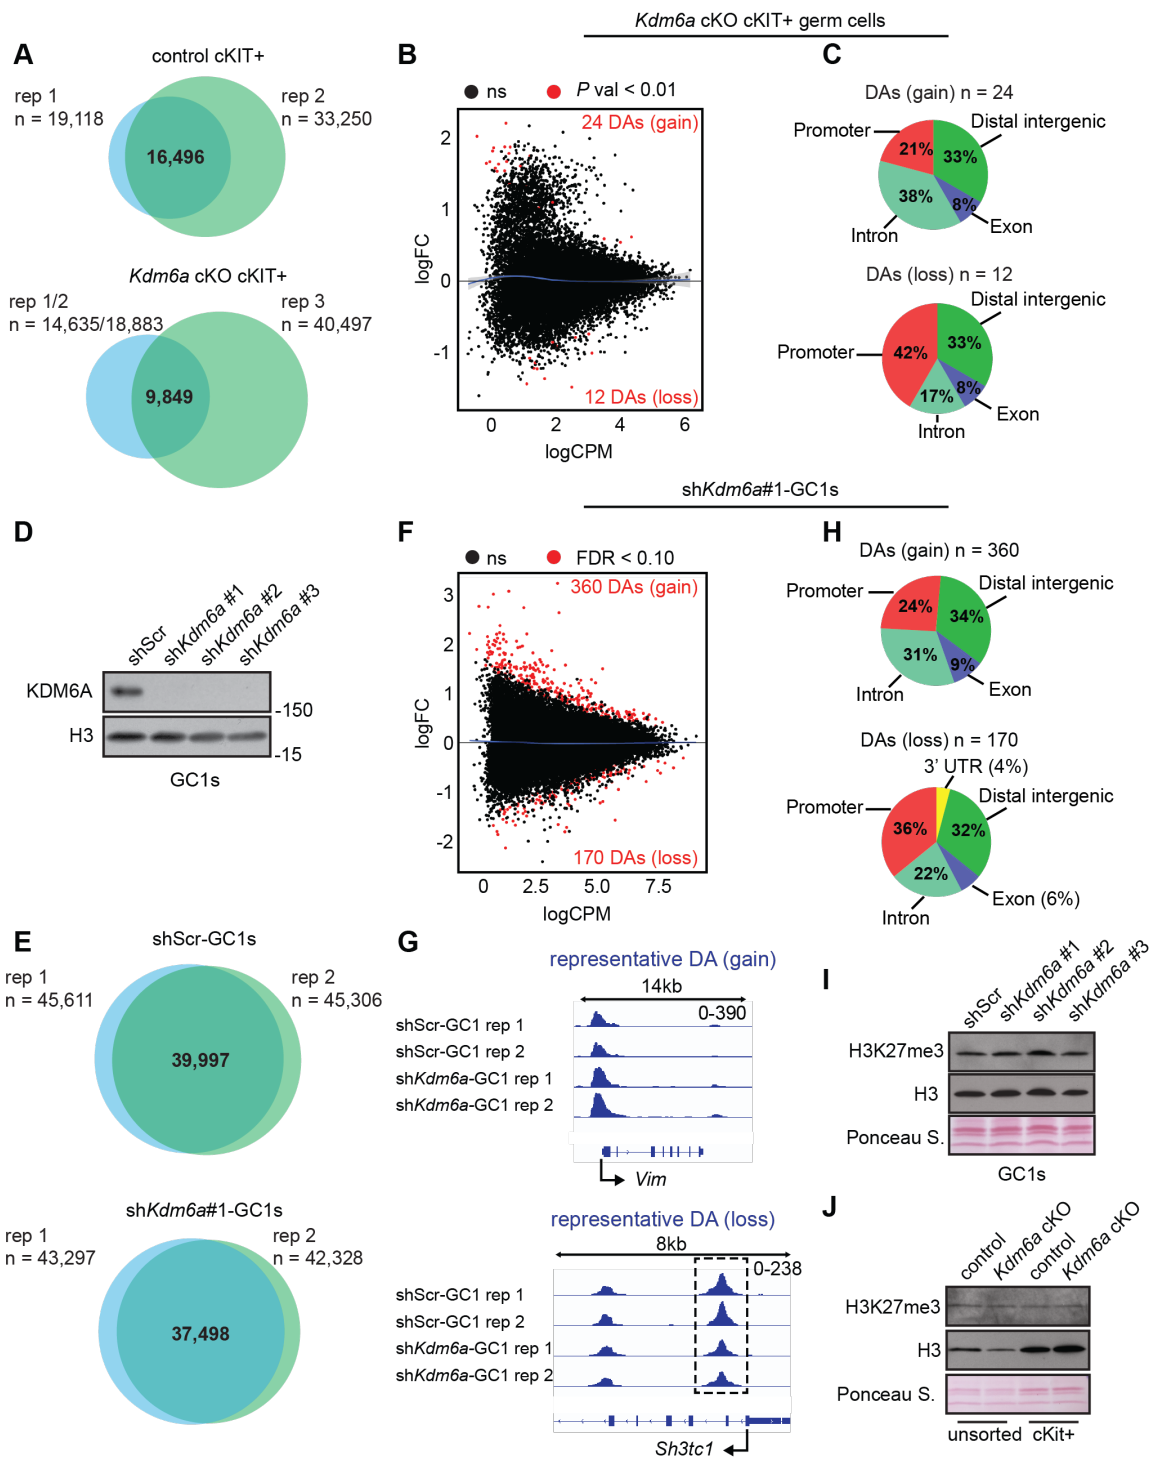

**Fig 3. Male germ cells depleted for KDM6A show modest changes in chromatin accessibility.** (A) Intersection of genomic coordinates for ATAC-seq peaks across replicates of cKIT-sorted cells from control and *Kdm6a* cKO testes. (B) MA plot for ATAC-enriched regions showing the distribution of differential chromatin accessibility in *Kdm6a* cKO cKIT+ cells. Black dots represent non-significant regions (ns) and red dots represent significant differentially accessible (DA) regions ( $p < 0.01$ ). Blue lines are loess fits to each distribution. (C) Gene feature distributions for DA regions detected in *Kdm6a* cKO cKIT+ cells. (D) Western blotting for KDM6A and histone H3 (loading control) in GC1-SPG cells expressing shScramble (shScr) or one of three different short-hairpin RNAs targeting *Kdm6a* mRNA. (E) Intersection of genomic coordinates for ATAC-seq peaks across replicates of shScr-GC1-SPGs and sh*Kdm6a*-GC1-SPGs. (F) MA plot for ATAC-enriched regions showing the distribution of differential chromatin accessibility in sh*Kdm6a*-GC1-SPGs. (G) Genome browser tracks for representative regions of chromatin accessibility gain (above) and loss (below) in sh*Kdm6a*-GC1-SPGs. (H) Gene feature distributions for DAs detected in sh*Kdm6a*-GC1-SPGs. (I) Western blot for H3K27me3 and histone H3 in shScr-GC1-SPGs and sh*Kdm6a*-GC1-SPGs. (J) Western blot for H3K27me3 and histone H3 in unsorted and cKIT-sorted cells from control and *Kdm6a* cKO testes.

228 **S3D**). Differentially accessible regions (DAs) between control and *Kdm6a* cKO samples were  
229 called at  $P < 0.01$  using the *csaw* pipeline with loess normalization (36). We detected only 24 DAs  
230 that gained chromatin accessibility and 12 DAs that lost chromatin accessibility in *Kdm6a* cKO  
231 cKIT<sup>+</sup> cells relative to control (**Fig 3B**). These changes were modest in magnitude and frequently  
232 occurred outside of promoters for gained DAs (**Fig 3C**).

233 Because variability in cell sorting limited our ability to detect subtle changes in accessibility  
234 in spermatogonia in vivo, we turned to a more controlled in vitro system, GC1 spermatogonial-  
235 derived cells, in order to minimize sample variability and enable robust quantitative comparisons.  
236 Expressing either of two short hairpin RNAs to *Kdm6a* in GC1 cells robustly depleted *Kdm6a* at  
237 the protein level (**Fig 3D**). ATAC-seq in GC1 cells expressing short hairpins against *Kdm6a*  
238 (*shKdm6a*) or scrambled control (*shScr*) yielded an average of 44,135 peaks across all samples.  
239 Overlap of peak coordinates across replicates was high for both *shKdm6a* and *shScr* (**Fig 3E, S1**  
240 **Dataset**), and peaks in both groups were predominantly localized to promoters of transcriptionally  
241 active genes (**Fig S3E, S3F and S3G**). Notably, we also found that approximately 70% of peak  
242 coordinates defined in cKIT-sorted cells from control testes intersected those called in *shScr*-GC1  
243 cells, indicating that accessibility in GC1 cells is broadly similar to spermatogonia in vivo (**Fig**  
244 **S3H**). In contrast to the paucity of DAs detected in cKIT<sup>+</sup> cells, we identified 530 highly significant  
245 DAs even with a more stringent threshold ( $FDR < 0.10$ ) in *shKdm6a*-GC1 cells (**Fig 3F and 3G**).  
246 Most DAs represented a gain in chromatin accessibility contrasting with the expected role of  
247 KDM6A in promoting accessibility. However, the DA regions that lost accessibility were more likely  
248 to occur at promoter regions, potentially indicating a more canonical and/or more direct activity of  
249 KDM6A at promoters (**Fig 3H**). While the pattern of gene feature distributions for gained and lost  
250 DAs was similar between cKIT-sorted *Kdm6a* cKO cells and *shKdm6a*-GC1 cells, there were no  
251 DAs called in common between the two cell types.

252 Because KDM6A is a H3K27me3 demethylase, we asked if cKIT<sup>+</sup> sorted *Kdm6a* cKO  
253 cells or *shKdm6a*-GC1 cells exhibited global gains in H3K27me3 relative to control cells to support  
254 a link between detected DAs and histone modification. We found that the global levels of



255 H3K27me3 as assayed by Western blotting were comparable between control lysates and  
256 KDM6A-depleted lysates (**Fig 3I and 3J**). These findings imply that any changes to H3K27me3  
257 are locus-specific, as previously seen in sperm of *Kdm6a* cKO mice (8), or that KDM6A mediates  
258 chromatin remodeling via regulation of alternative modifications, such as H3K27ac or H3K4me1.

259 Finally, we compared our accessibility data in cKIT+ sorted spermatogenic cells with  
260 differentially methylated regions (DMRs) previously identified in sperm of *Kdm6a* cKO animals  
261 (8). Five hundred thirty-nine (6%) of all DMRs overlap regions of open chromatin in  
262 spermatogonia, a six-fold enrichment over the amount of overlap observed when DMR intervals  
263 were randomly shuffled across the genome ( $P < 0.0001$ , z-test for one proportion). Thus,  
264 chromatin accessibility in *Kdm6a*-expressing spermatogonia is modestly but statistically  
265 significantly associated with sites of altered DNA methylation in sperm following KDM6A  
266 depletion.

267 Together, these results show that KDM6A plays a limited role in regulating chromatin  
268 accessibility in differentiating spermatogonia in vivo.

269

## 270 **KDM6A is a transcriptional activator in pre-meiotic male germ cells**

271 KDM6A is a positive regulator of transcription in mammalian cells through its H3K27 demethylase  
272 activity and its association with MLL3/4 complexes to promote H3K4 mono-methylation at  
273 promoters and enhancers (10-12, 37). We next sought to define any genome-wide transcriptional  
274 effects of *Kdm6a* loss in the male germline by calling differentially expressed genes (DEGs)  
275 between *Kdm6a* cKO and control testes from our scRNA-seq datasets. Across all clusters, a total  
276 of 886 distinct genes exhibit significantly altered expression (**S2 Dataset**), with the greatest  
277 number of DEGs found in cells where *Kdm6a* is most highly expressed and detectable as a DEG  
278 (**Fig 4A, S4A**). To validate these data, we also performed bulk RNA-seq in control and *Kdm6a*  
279 cKO whole testes (n=3) and confirmed using gene set enrichment analysis (GSEA, (38, 39)) that  
280 similar sets of genes exhibited altered expression (**Fig S4B**). Deregulation of gene expression

281 was strongly biased towards downregulation (76% of DEGs, **Fig 4B**), consistent with the known  
282 function of *Kdm6a* as a transcriptional activator. Upregulated DEGs are enriched for Gene  
283 Ontology (GO) terms related to cytoplasmic translation, while downregulated DEGs were more  
284 weakly enriched for several germ-cell related terms, the most significant being “spermatid  
285 development” (**Fig 4C**). Notably, while the expression of the homologs *Uty* and *Kdm6b* was  
286 unchanged, we found that other histone lysine demethylases (*Kdm1a*, *Kdm3a*, *Kdm5a*, *Kdm5b*,  
287 *Kdm3c*) and chromatin remodelers (*Smarca2* and *Chd5*) were downregulated in *Kdm6a* cKO  
288 testes (**Fig 4D**). Based on the strong bias toward downregulation and known role of KDM6A as a  
289 transcriptional activator, we focused our subsequent analysis on the downregulated DEGs  
290 detected in *Kdm6a*-expressing cell populations (i.e., clusters 4 and 5) as they are most likely to  
291 represent direct target genes of KDM6A. These high-confidence DEGs were enriched for GO  
292 terms related to meiosis, sperm motility, histone modification and chromosome organization (**Fig**  
293 **4E**). Interestingly, we found that approximately half of DEGs identified in cluster 3, representing  
294 the terminal stage of spermatogenesis (fully elongated and condensed sperm heads), were also  
295 called as DEGs in either cluster 4 or cluster 5 (**Fig 4F**). A smaller subset of these genes ( $n = 25$ ),  
296 almost all of which are downregulated, was identified as DEGs across all three clusters (**Fig 4G**),  
297 suggesting that for some broadly expressed genes, KDM6A establishes regulatory information  
298 that persists across spermatogenesis.

299 We did not find an association between genes near DAs called in cKIT<sup>+</sup> sorted cells from  
300 *Kdm6a* cKO testes (see previous section) and DEGs identified in our scRNA-seq dataset, likely  
301 due to the variability in the ATAC-seq data derived from sorted cKIT<sup>+</sup> cells. We therefore applied  
302 our GC1 knockdown model to ask if transcriptional and chromatin accessibility effects of KDM6A  
303 depletion were correlated in GC1 cells. We assessed expression changes between sh*Kdm6a* and  
304 shScr GC1 cells and detected 1,463 DEGs ( $P$  adj < 0.05, **S3 Dataset**) in sh*Kdm6a*#1-GC1 cells  
305 relative to shScr control cells, with *Kdm6a* being one of the most significantly downregulated  
306 genes (**Fig S4C**). Consistent with our in vivo findings, there was a bias towards downregulation  
307 (77% of total DEGs  $P$  adj < 0.05, > 1.5 fold change). Expression of a different short hairpin RNA

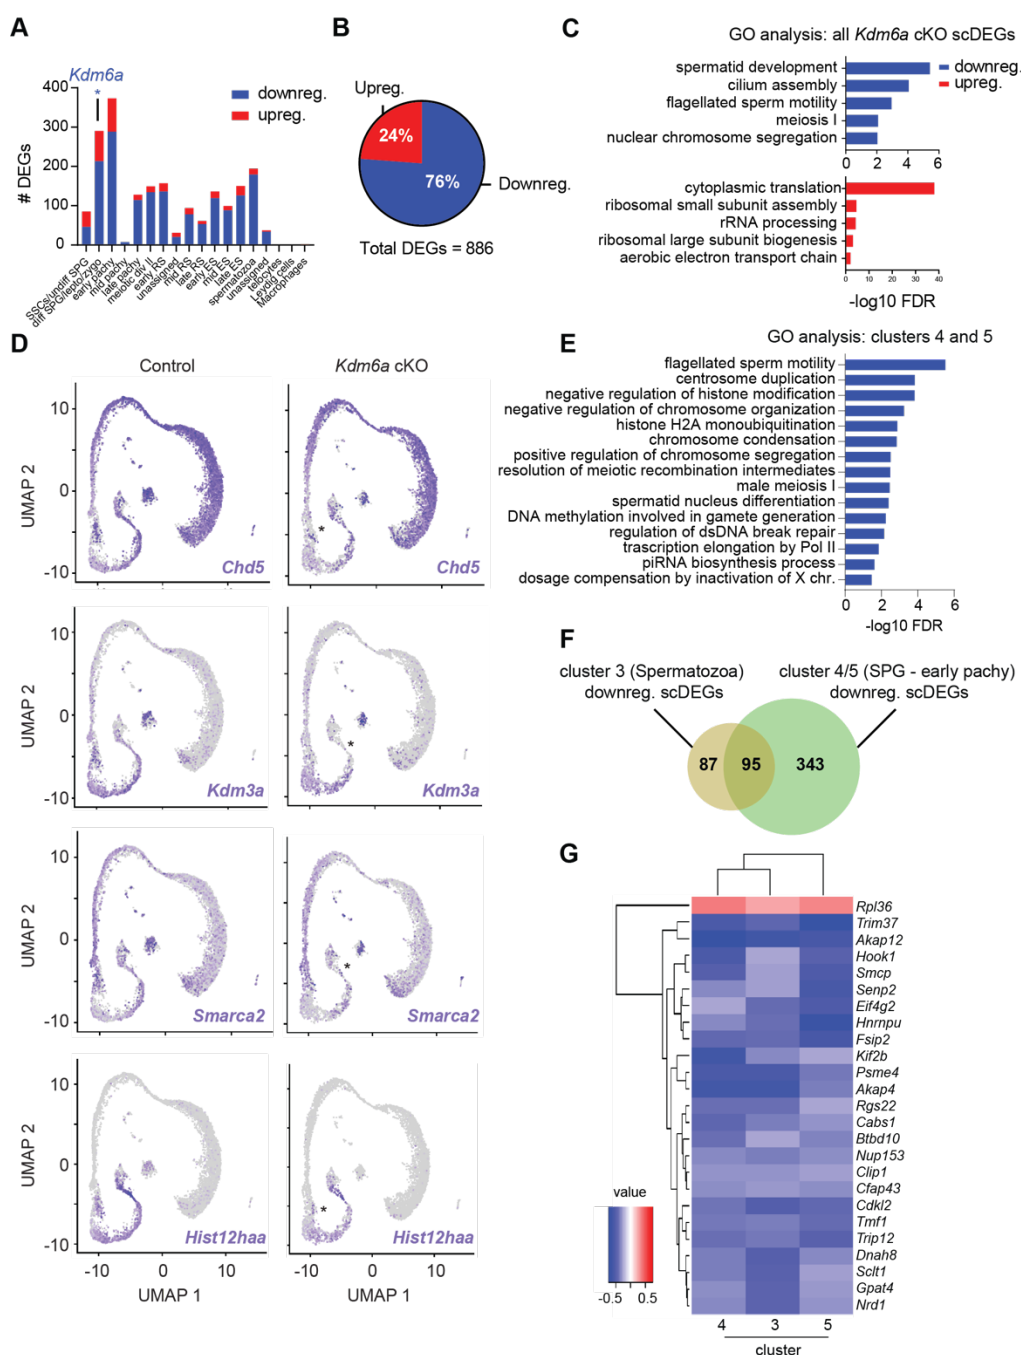

**Fig 4. KDM6A is a transcriptional activator in early spermatogenic cells.** (A) Fraction of differentially expressed genes identified by scRNA-seq (scDEGs) that are downregulated and upregulated in *Kdm6a* cKO testis relative to control. (B) Numbers of scDEGs identified per cluster, labeled by testis cell identity. *Kdm6a* is identified as a scDEG in cluster 4, which comprises differentiated spermatogonia and early stages of meiotic prophase. (C) Gene ontology analysis showing terms enriched in all downregulated and upregulated scDEGs identified in *Kdm6a* cKO testes. (D) UMAPs showing the expression for representative downregulated scDEGs associated with chromatin organization and remodeling. Asterisks (\*) mark cells with most profound changes in expression. (E) Gene ontology terms enriched in scDEGs identified for clusters 4 and cluster 5 i.e., cell populations spanning differentiated spermatogonia to early pachytene. (F) Overlap of scDEGs identified in cells classified into cluster 3 (spermatozoa) and clusters 4/5 (differentiating spermatogonia and early meiotic cells). (G) Heatmap showing the normalized gene expression levels in *Kdm6a* cKO testis for 25 genes that are deregulated in cluster 3, cluster 4, and cluster 5.

308 sequence to *Kdm6a* (*shKdm6a#2*) yielded similar results, confirming that the observed gene  
 309 expression changes were not due to off-target effects (Fig S4D, S4E, S3 Dataset). GSEA

310 revealed a significant enrichment for genes associated with loss of chromatin accessibility in  
311 *shKdm6a#1*-GC1 cells and downregulated genes (**Fig S4F**). We did not find any enrichment for  
312 genes associated with gains in chromatin accessibility and upregulated gene expression. Only  
313 twenty-four DEGs detected in *shKdm6a#1*-GC1 cells were also called in our *Kdm6a* cKO scRNA-  
314 seq dataset (**Fig S4G**). Interestingly however, these included several genes important for  
315 spermatogenesis, such as *Chd5*, a master regulator of the histone-to-protamine transition (40)  
316 and *Cdc14a*, an essential factor for male fertility in mouse and human (41).

317 We conclude that KDM6A promotes timely expression of genes related to chromatin  
318 organization predominantly during meiotic entry in the male germline. Loss of KDM6A leads to  
319 altered transcriptional states during meiotic entry as well as later in spermatogenesis. There is  
320 little association between transcriptional effects and KDM6A-directed chromatin remodeling,  
321 although some subtle transcriptional changes detected in our in vitro model may be mediated by  
322 KDM6A-directed remodeling events.

323

### 324 **A subset of *Kdm6a* cKO DEGs are persistently deregulated in the germlines of wildtype** 325 **offspring**

326 The soma of wild type mice derived from a paternal germline lacking KDM6A (*Kdm6a* F1) exhibit  
327 transcriptomic and DNA methylation changes (8). These changes were reported to be greater in  
328 magnitude in the soma of wildtype mice that were derived from two successive generations of  
329 paternal germline lacking KDM6A (*Kdm6a* F2, **Fig 5A**), implying that KDM6A activity in the male  
330 germline confers gene regulatory information important for the next generation that is additively  
331 perturbed in its absence over successive generations. We therefore asked if gene expression  
332 changes could be detected in the male germ lines of *Kdm6a* F1 and *Kdm6a* F2 mice despite  
333 expression of functional *Kdm6a* (**Fig S5A**).

334 Bulk RNA-seq analysis of whole adult testis data from *Kdm6a* F1 mice identified only sixty-  
335 four DEGs (**S4 Dataset**), indicating that the overall germ cell transcriptome is largely unaffected

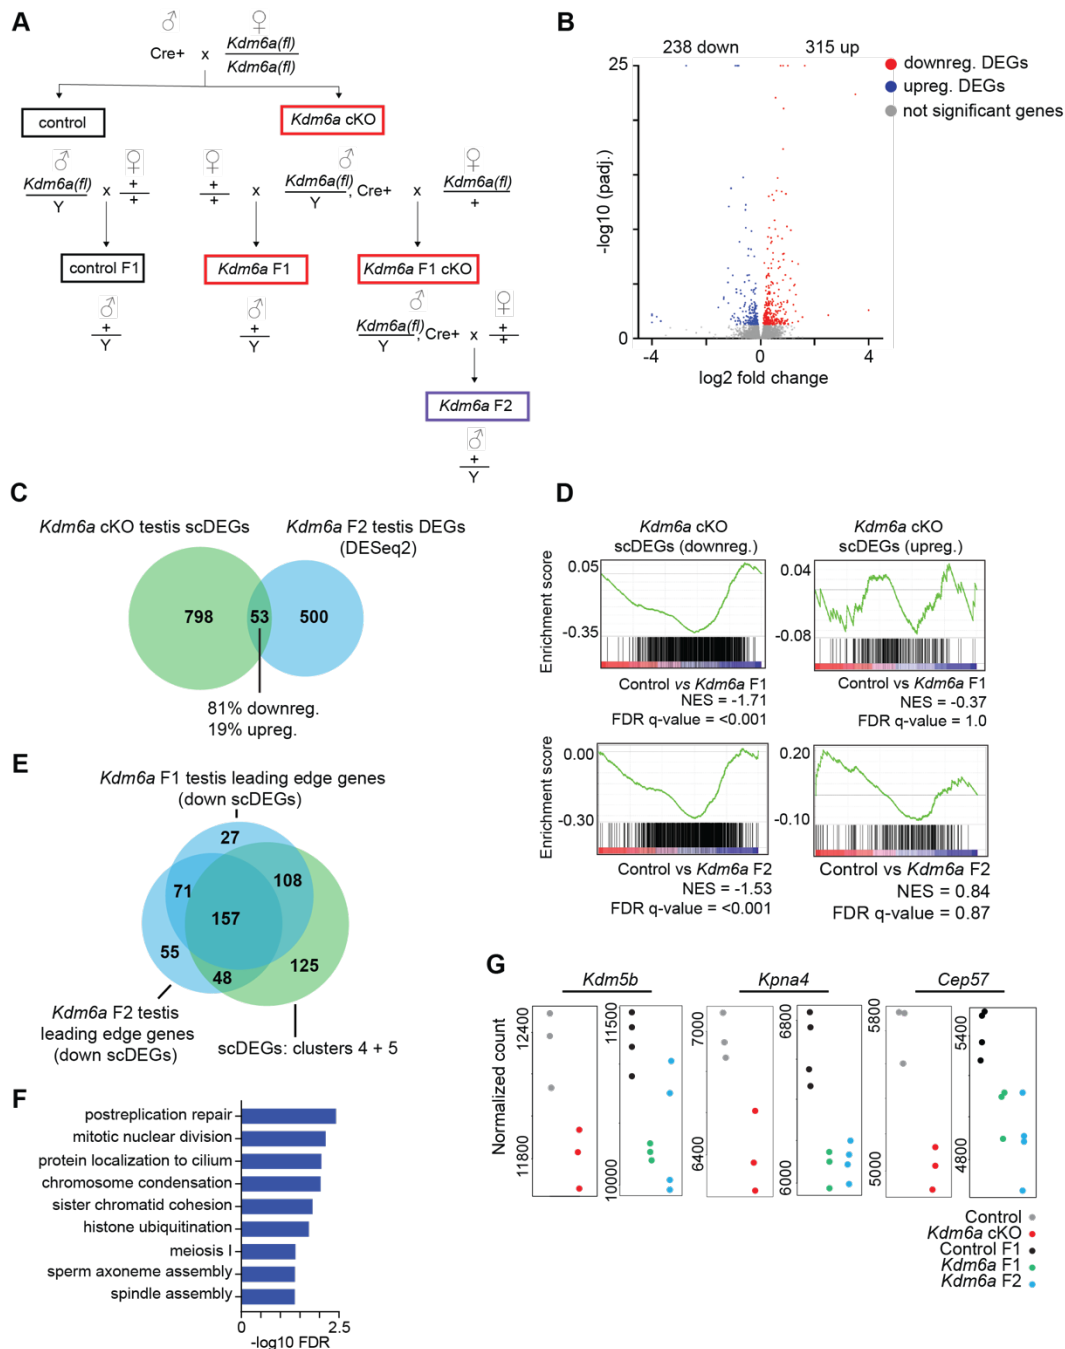

**Fig 5. A subset of differentially expressed genes in the *Kdm6a* cKO germline is persistently deregulated in testes of wildtype offspring.** (A) Breeding scheme for the generation of *Kdm6a* cKO mice and wildtype progeny: *Kdm6a* F1 and *Kdm6a* F2. (B) Volcano plot showing the gene expression changes in *Kdm6a* F2 testes relative to control. (C) Overlap of differentially expressed genes (DEGs) detected by single cell RNA-seq (scRNA-seq) in *Kdm6a* cKO testis and DEGs identified by analysis of bulk RNA-seq of *Kdm6a* F2 testes. (D) Gene set enrichment analysis (GSEA) plots showing the enrichment of *Kdm6a* F1 (top) and *Kdm6a* F2 (bottom) expression data for all single cell DEGs (scDEGs) identified in *Kdm6a* cKO testis. The non-significant enrichment for upregulated scDEGs is shown by the GSEA plots to the right. Normalized enrichment score = NES. (E) Overlap of scDEGs for clusters 4 and 5 in *Kdm6a* cKO testis with the leading-edge genes (LEGs) identified by the GSEA of *Kdm6a* F1 and *Kdm6a* F2 testis expression data. (F) Gene ontology terms enriched for leading edge genes shared between *Kdm6a* F1 and *Kdm6a* F2 gene expression datasets. (G) Normalized counts plotted for representative DEGs that are persistently deregulated across the germline of *Kdm6a* cKO, *Kdm6a* F1, and *Kdm6a* F2 mice.

336 by KDM6A loss in the paternal germline. However, we identified 531 DEGs ( $P$  adj. <0.05, **S4**  
337 **Dataset**) in whole adult testes of *Kdm6a* F2 mice, implying that absence of KDM6A in the male

338 germ line for two successive generations results in cumulative changes in the gene regulatory  
339 state of the male germline in offspring (**Fig 5B**). Unlike the *Kdm6a* cKO germline, we did not detect  
340 any bias in the direction of deregulation. Fifty-three DEGs (10% of all *Kdm6a* F2 DEGs) detected  
341 in *Kdm6a* F2 testes were also identified as DEGs in our scRNA-seq dataset from *Kdm6a* cKO  
342 testis with the bulk of this overlap coming from downregulated DEGs (**Fig 5C**). This result  
343 suggested that a subset of DEGs induced by loss of *Kdm6a* in the parental germline is persistently  
344 deregulated across generations. GSEA with *Kdm6a* F1 and F2 whole testis expression data  
345 revealed a significant (nominal  $P < 0.0001$ ) enrichment for downregulated, but not upregulated,  
346 scDEGs identified in *Kdm6a* cKO testis (**Fig 5D**). We found a high overlap between the genes  
347 that contributed most to this enrichment signal ('leading-edge genes') in *Kdm6a* F1 and *Kdm6a*  
348 F2 datasets, indicating that a defined subset of genes is persistently, albeit mildly, deregulated  
349 across generations (**Fig 5E**). GO analysis revealed that this subset of genes is predominantly  
350 enriched for terms related to chromosome organization and histone modification (**Fig 5F**); notable  
351 examples included the chromatin modifiers *Chd5* and *Kdm5b*. The majority of leading-edge genes  
352 (~69%) were identified as downregulated scDEGs in cluster 4 and cluster 5, implying that most  
353 persistently deregulated genes represent those of putative direct KDM6A target genes in the male  
354 germline (**Fig 5E**). Consistent with this finding, GSEA of *Kdm6a* F1 and *Kdm6a* F2 expression  
355 datasets revealed a greater enrichment for downregulated scDEGs identified in cluster 4 and  
356 cluster 5 relative to scDEGs for all other clusters (**Fig S5B and S5C**). We conclude that KDM6A  
357 activity in the paternal germline contributes to gene regulatory state in the germlines of male  
358 offspring.

359

## 360 **Discussion**

361 Mice derived from a paternal germline lacking *Kdm6a* have a reduced lifespan and more readily  
362 develop cancers (8). Thus, KDM6A likely has activities in the male germline that are important for  
363 gene regulation in the next generation. To identify these activities and begin to understand how



364 they relate to offspring health, we evaluated the regulatory and phenotypic consequences of  
365 deleting *Kdm6a* in the postnatal male germ line. We found that *Kdm6a* is expressed specifically  
366 and transiently in late spermatogonia and during early meiosis, and that while KDM6A loss is  
367 compatible with normal sperm production and fertility, it perturbs gene regulatory programs that  
368 have lasting effects in late spermatogenesis and in germ cells of subsequent generations.

369 Although previous studies reported broad KDM6A expression across adult human and  
370 mouse seminiferous epithelium, including spermatocytes and round spermatids (42, 43), we  
371 found that *Kdm6a* expression was limited to late spermatogonia and the early stages of meiotic  
372 prophase. This discrepancy could be explained by cross-reactivity of anti-KDM6A antibodies in  
373 tissue sections; indeed, we excluded several commercially-sourced antibodies from our study due  
374 to non-specific binding in cKO testis sections. Given its precisely timed expression, we speculate  
375 that KDM6A may participate in balancing the deposition of histone modifications during the  
376 mitosis-meiosis transition, and that rapid downregulation of KDM6A expression soon after early  
377 prophase is important for maintaining an appropriate histone methylome at this key  
378 developmental timepoint. Histone methylation plays a critical role during meiotic entry: histone  
379 methyltransferases participate in meiotic recombination, synapsis, and chromosome segregation  
380 (44), and major changes in histone methylation, including accumulation of H3K27me<sub>3</sub>, occur on  
381 sex chromosomes during prophase I to mediate transcriptional silencing (45). Our scRNA-seq  
382 data highlights KDM6A as a transcriptional activator that supports the meiotic gene expression  
383 program, albeit in a manner dispensable for meiotic progression overall. Along with mESCs, germ  
384 cells are also uniquely rich in bivalent promoters co-occupied by H3K27me<sub>3</sub> and H3K4me<sub>3</sub>. The  
385 bivalent state facilitates the mitosis-meiosis transition (46) and is thought to encode regulatory  
386 information for embryonic development (25). KDM6A has been shown to resolve bivalent domains  
387 to univalent states during differentiation of mESCs and human neural progenitor cells (18, 47).  
388 Future experiments in which KDM6A is ectopically expressed in post-meiotic germ cells will be of  
389 interest to better determine the significance of its restricted developmental expression.

390           While loss of KDM6A has virtually no effect on spermatogenic phenotype, we found that  
391 it has a substantial effect on gene expression. The majority of changes in gene expression  
392 occurred in the same cell populations that normally express KDM6A, but many expression  
393 changes also occurred during late spermatogenesis, implying that regulatory consequences of  
394 KDM6A loss extend throughout spermatogenic development. DEGs identified in the *Kdm6a* cKO  
395 were enriched for genes encoding other epigenetic modifiers, suggesting that the gene regulatory  
396 activity of KDM6A can indirectly affect the chromatin landscape in the male germline. For  
397 example, regulators of histone ubiquitination represent a major subset of DEGs following KDM6A  
398 loss, making changes in the global distribution of this modification in the *Kdm6a*-null germline a  
399 promising question for future studies. Additionally, KDM6A may be active towards other histone  
400 substrates besides H3K27me3, including the enhancer marks H3K4me1 and H3K27ac (33, 37).  
401 We previously observed locus-specific changes in levels of H3K27me3 in mature spermatozoa  
402 from *Kdm6a*-null mice corresponding to redistribution of the H3K27me3 modification (8). Further  
403 work defining the genome-wide distribution of H3K27me3, H2AK119ub, H3K4me1, and H3K27ac  
404 throughout spermatogenesis in the *Kdm6a* cKO will help to address the extent to which KDM6A  
405 indirectly affects gene expression via modulation of the expression levels of other histone  
406 modifiers. Low-input methods can also be used to determine genome-wide occupancy of KDM6A  
407 in early spermatogenic cells in order to identify its direct targets.

408           KDM6A loss has been shown to have strong effects on chromatin accessibility and the  
409 expression of corresponding genes in other cell types (33, 34), but we did not find a similarly  
410 strong effect on accessibility in the male germline. This could be because the population of late  
411 spermatogonia we were able to sort based on cKIT marker expression does not precisely  
412 correspond to the window of KDM6A expression during spermatogenesis. In GC1 cells depleted  
413 for KDM6A, we identified more, stronger changes in accessibility compared to cKIT-sorted cells,  
414 but we did not find a bias toward loss of accessibility as expected based on the known role of  
415 KDM6A as a transcriptional activator, nor did we find a strong connection to gene expression  
416 changes. This result is consistent with a previous ATAC-seq study in *Kdm6a*-null hematopoietic



417 stem cells which revealed an approximately equal balance between gain and loss of chromatin  
418 accessibility and little correlation with KDM6A occupancy at corresponding genes. Further work  
419 is needed to understand if KDM6A can directly promote chromatin accessibility or if its  
420 accessibility effects are primarily indirect.

421         Based on the lack of a spermatogenic phenotype in *Kdm6a* cKO mice, we considered the  
422 possibility of redundancy with KDM6B and UTY, homologs that have been shown to function  
423 redundantly during mouse embryonic development and cellular differentiation, respectively (48,  
424 49). *Uty* transcript abundance is very low in testes, only partly overlaps in developmental timing  
425 with *Kdm6a*, and is not upregulated in the context of the *Kdm6a* cKO, leading us to conclude that  
426 *Uty* likely does not compensate for *Kdm6a*. KDM6B expression does overlap with KDM6A and  
427 the phenotype of *Kdm6b* germline cKO males is similar: *Kdm6b* cKO males are fertile with higher  
428 numbers of undifferentiated spermatogonia (42). Therefore, *Kdm6b* may be partially redundant  
429 with *Kdm6a* during spermatogenesis. The lack of global changes in H3K27me3 we observed in  
430 *Kdm6a* cKO testes mirrors previous reports in the *Kdm6b*-null male mouse germline and further  
431 supports redundancy between these homologs in spermatogenesis. KDM7B may also have some  
432 functional redundancy with KDM6A given that their expression profiles are very similar across  
433 spermatogenesis. Like *Kdm6a*, *Kdm7b* is X-linked in mammals and can demethylate H3K27 in  
434 zebrafish (31). Definitive assessment of redundancies between KDM6A and UTY, KDM6B, and  
435 KDM7B in the male germline will require generation of mice multiply knocked out for each of these  
436 factors.

437         All together, our analysis of spermatogenesis in *Kdm6a* cKO mice excludes sperm  
438 dysfunction as a primary explanation for the previously observed intergenerational effect on  
439 lifespan and cancer. Instead, we provide evidence supporting an intergenerational role for KDM6A  
440 activity in regulation of gene expression in the germ line by showing that some expression  
441 changes induced by KDM6A loss in spermatogenic cells are retained in the germ cells of  
442 subsequent generations. This observation is surprising, since acquired epigenetic information is  
443 largely reset in the next generation both soon after fertilization and during primordial germ cell

444 development. Our findings here mirror a recent report  
445 in *C. elegans* showing that the status of H3K27me3  
446 at sperm alleles is inherited across generations to  
447 regulate gene expression in the germline (50). A  
448 similar mechanism may be at play in our mammalian  
449 model given that KDM6A targets H3K27me3. We  
450 speculate that loss of KDM6A in the male germline  
451 permits accumulation of epimutations, some of which  
452 are resistant to erasure in the next generation and are  
453 difficult to reset even in the presence of a functional  
454 *Kdm6a* allele. Therefore, KDM6A may act during the  
455 dynamic chromatin reorganization that occurs at the  
456 start of meiosis to safeguard the male germline from  
457 acquiring altered epigenetic states (**Fig 6**). Future  
458 work will define the nature and location of these  
459 epimutations, as well as the mechanism by which  
460 they might resist reprogramming.

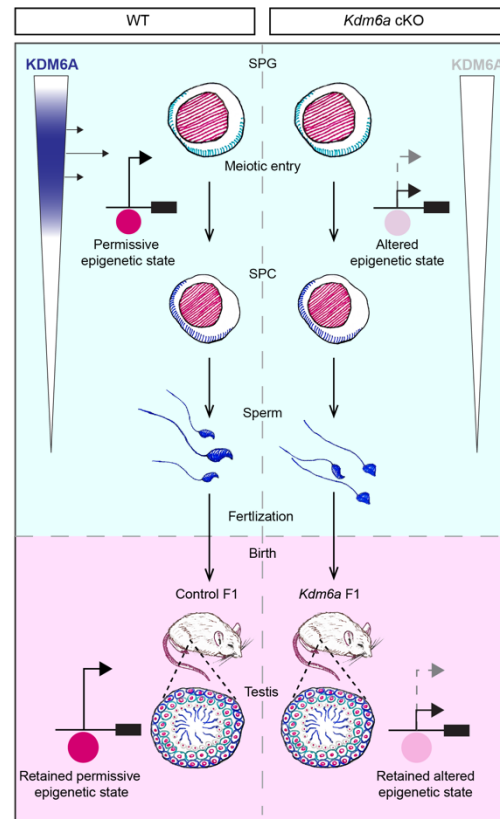

**Fig 6. Model for intergenerational inheritance of gene regulatory states following deletion of *Kdm6a* in the male germline.** KDM6A is predominantly expressed during the mitotic-to-meiotic transition in the male germline where it functions as a transcriptional activator putatively through promoting permissive epigenetic states. Absence of KDM6A may alter epigenetic states to perturb gene expression. These altered gene regulatory states in *Kdm6a* cKO sperm resist reprogramming at a subset of loci upon fertilization and development, resulting in perturbed transcriptional profiles in the *Kdm6a* F1 germline. Spermatogonia (SPG) and Spermatocyte (SPC).

## 461 **Materials and Methods**

462

### 463 **Mouse breeding and animal care**

464 All mice were maintained on a C57BL/6J genetic background. To obtain *Kdm6a* cKO males,  
465 *Kdm6a*<sup>flox/flox</sup> (*Kdm6a*<sup>tmc1(EUCOMM)Jae</sup>) females were mated with mice carrying one copy of the *Ddx4*-  
466 Cre transgene (B6-*Ddx4*<sup>tm1.1(cre/mOrange)Dcp</sup>) (51, 52) in which Cre is expressed specifically in germ  
467 cells beginning at embryonic day 15.5. *Kdm6a* F1 males were generated by crossing male *Kdm6a*  
468 cKO mice with wildtype females. *Kdm6a* F1 cKO males were generated by breeding male *Kdm6a*  
469 cKO mice with female *Kdm6a*<sup>flox/+</sup> mice, which were then crossed with wildtype females to  
470 generate wildtype *Kdm6a* F2 males. Primers used for genotyping are listed in **Table S1**. These  
471 studies were approved by the Yale University institutional animal care and use committee under  
472 protocol 2020-20169. All mice used in these studies were maintained and euthanized according  
473 to the principles and procedures described in the National Institutes of Health guide for the care  
474 and use of laboratory animals.

475

### 476 **GC1-SPG culture and transduction**

477 GC-1spg cells (ATCC, CRL-2053) were cultured in DMEM (Gibco, 11965092) supplemented with  
478 10% fetal bovine serum (Corning, 35-011-CV), 1 mM sodium pyruvate (Gibco, 11360-070), and  
479 pen-strep (Gibco, 15140-122). At 90% confluency, cells were passaged 1:15 every 3 days using  
480 trypsin (Gibco, 25300054) and centrifugations at 200 xg. *Kdm6a* knockdown cell lines were  
481 generated by reverse lentiviral transduction of shRNAs expressed from a pZIP-mEF1 $\alpha$ -ZsGreen-  
482 Puro lentiviral vector (TransOMIC Technologies) in the presence of 8  $\mu$ g/ml polybrene. Three  
483 days after transduction, the cells were treated with 2  $\mu$ g/ml puromycin for a week to select for  
484 stable transductants. Sequences for shRNA constructs can be found in **Supplementary Table**

485 **S1.** MycoStrip™ (InvivoGen, rep-mys-10) did not detect mycoplasma contamination in any of the  
486 cell cultures used in this study.

487

#### 488 **Immunoblotting**

489 Whole cell lysates were prepared using RIPA buffer supplemented with 0.9% SDS. Subcellular  
490 fractions were prepared according to Gagnon *et al.* (2014). Up to 40µg of total protein was loaded  
491 onto a Mini-PROTEAN TGX gel (Bio-Rad, 456-8093) and separated by SDS-PAGE for 1 hour at  
492 200 volts. Separated proteins were then wet transferred to a 0.45 µm nitrocellulose membrane  
493 (GE Healthcare Life Science, 10600003) in Towbin buffer (25mM Trizma base, 192 glycine, 20%  
494 (v/v) methanol) at a constant current of 250mA for 1 hour. The membrane was then briefly  
495 incubated in Ponceau S (Sigma Aldrich, P7170), washed in TBST, then blocked in 5% w/v non-  
496 fat dry milk (American Bio, ab10109-01000) in TBST for 30 mins with gentle agitation at room  
497 temperature. Primary antibodies were diluted in blocking buffer and incubated with the membrane  
498 overnight at 4°C with gentle rocking. After washing in TBST the membranes were incubated with  
499 peroxidase conjugated secondary antibodies diluted 1:10,000 in blocking buffer. Following  
500 washing, the membrane was incubated for 5 mins in SuperSignal™ West Pico Plus (Thermo,  
501 34580) or the Femto variant (Thermo, 34096) and the signal was captured with X-ray film  
502 (Thermo, 34090). Antibodies used for immunoblotting are listed in **Table S2**.

503

#### 504 **Tissue staining**

505 Mouse testes were dissected and immersed in Hartman's fixative for 30 mins at room temperature  
506 before bisecting for further fixation overnight at 4°C on an end-to-end rotator. Fixed testes were  
507 subjected to standard dehydration and clearing processing for paraffin embedding. Wax sections  
508 were stained with hematoxylin and eosin for histological analysis and indirect  
509 immunofluorescence was performed after heat-induced epitope retrieval with citrate buffer  
510 (Vector Laboratories, H-3300). Confocal images were taken using a Zeiss LSM 880 microscope.

511 Antibodies used for immunostaining are listed in **Table S2**. In situ hybridization was performed  
512 using RNAscope 2.5 HD assay- RED (ACDBio, 322360) according to the manufacturer's  
513 instructions. The assay was optimized by performing heat-induced antigen retrieval for 15 mins  
514 and protease III digestion for 30 mins at room temperature.

515

### 516 **Immunocytochemistry**

517 Meiotic spreads were prepared as previously described (54) for subsequent indirect  
518 immunofluorescence. Confocal images were taken using a Zeiss LSM 880 microscope.  
519 Antibodies used for staining are listed in **Table S2**.

520

### 521 **Testis cell dissociation**

522 Decapsulated testes were incubated in DMEM containing 0.75 mg/ml collagenase type IV (Gibco,  
523 17104-019) for 10 mins at 37°C with occasional inversion. Equal volume of DMEM was added to  
524 the suspension of dissociated tubules before centrifuging at 400 xg for 5 mins at 4 °C. After  
525 removing the supernatant, the cell pellet was washed in DMEM and resuspended in 0.05%  
526 trypsin-EDTA (Gibco, 25200-056) for 10 mins incubation at room temperature. An equal volume  
527 of ice-cold DMEM+10%FBS was then added to the cell suspension before washing the pellet  
528 twice with media. The cell pellet was resuspended in DPBS (Sigma, D8537) containing 0.04%  
529 bovine serum albumin (sigma, A9647) and filtered through a 100 µm filter (Falcon, 22363549)  
530 then a 40 µm filter (Falcon, 352340) to generate a single cell suspension.

531

### 532 **Spermatogonia enrichment by flow cytometry**

533 Dissociated germ cells were incubated in the dark for 30 mins with PE conjugated anti-cKIT at  
534 1:800 (Thermo, 12-1171-82). Stained cells were then washed twice, resuspended to 10 million  
535 cells/ml and sorted on a two-laser (466 nm and 561 nm) cell sorter (Bio-Rad S3) as previously

536 described (55). Briefly, debris was removed from the plot based on FSC-A/SSC-A and singlets  
537 were selected based on FSC-H/FSC-A. A histogram of FL1-A was used to identify positively  
538 stained cells compared to an unstained aliquot.

539

#### 540 **Morphological assessment of spermatozoa**

541 Cauda epididymides were dissected from adult male mice and cut into 1 ml of warm M2 medium  
542 (Sigma, M7167) to allow sperm to swim out. After 15 mins, the cell suspension was centrifuged  
543 for 2 mins at 2000 xg at 4 °C and the resulting pellet was resuspended in 4% paraformaldehyde  
544 for 20 mins at room temperature. Fixed spermatozoa were pelleted and washed twice in 100 mM  
545 ammonium acetate before resuspending in 150 µl wash buffer. 5 µl of this cell suspension was  
546 spread across a glass slide and air dried followed by Coomassie staining for 10 mins. After rinsing  
547 in tap water, the slides were air dried then coverslipped with DPX (Sigma, 06522). The percentage  
548 of sperm with abnormal heads was visually assessed from >400 sperm for each biological  
549 replicate using brightfield microscopy under blinded conditions.

550

#### 551 **Motility assessment of spermatozoa**

552 Cauda epididymal sperm were collected by swim-out (described above) and aliquots were placed  
553 in a slide chamber (Cell Vision, 20 mm depth). Motility was examined on a 37 °C stage of a Nikon  
554 E200 microscope under a 10X phase contrast objective (CFI Plan Achromatic 10X/0.25 Ph1 BM,  
555 Nikon). Images were recorded (40 frames at 50 fps) using a CMOS video camera (Basler  
556 acA1300-200µm, Basler AG, Ahrensburg, Germany) and analyzed by computer-assisted sperm  
557 analysis (CASA, Sperm Class Analyzer version 6.3, Microptic, Barcelona, Spain). Sperm total  
558 motility and hyperactivated motility was quantified simultaneously. Over 200 motile sperm were  
559 analyzed for each trial.

560

561 **RNA isolation**

562 For bulk RNA-sequencing and RT-qPCR, total RNA was extracted from pelleted cells and  
563 dissected seminiferous tubules by homogenizing in 1 ml of TRIzol reagent (Invitrogen, 15596026).  
564 After 5 mins of incubation, the lysate was mixed with 200µl of chloroform and centrifuged at 12,000  
565 xg for 15 mins at 4°C. The aqueous phase was mixed with an equal volume of 100% ethanol and  
566 transferred to an RNeasy MinElute spin column (Qiagen, 74104) for purification according to the  
567 manufacturer's instructions. The quality of the eluted RNA was assessed by 28S/18S ribosomal  
568 ratios and RNA integrity number (RIN) using an Agilent Bioanalyzer.

569

570 **Real-time quantitative PCR**

571 Reverse transcription of 1 µg of total RNA was performed with oligo(dT) and SuperScript III  
572 reverse transcriptase (Thermo, 18080051) in a total volume of 20 µl according to the  
573 manufacturer's instructions. Reaction mixtures were incubated in a thermocycler at 65 °C for 10  
574 mins then 50 °C for 50 mins before stopping the reaction at 85 °C for 5 mins. Real-time  
575 quantitative PCR (RT-qPCR) assays were performed in a total reaction volume of 20 µl consisting  
576 of 4 µl of cDNA diluted 1:5, 0.4 µl of 10 µM forward/reverse primer mix, 10 µl of Power SYBR  
577 Green PCR Master Mix (Applied Biosystems, 4367659) and 5.6 µl nuclease-free water. Reactions  
578 for each target gene were performed in duplicate in a 96 well plate loaded into an Applied  
579 Biosystems QuantStudio 3 Real-Time PCR system. Standard cycling conditions were used: Hold  
580 stage (x1): 50 °C for 2 mins, 95 °C for 10 mins; PCR stage (x40): 95 °C for 15 secs, 60 °C for 1  
581 min. Melt curve stage conditions were: 95 °C for 15 secs, 60°C for 1 min, 95 °C for 15 secs.  
582 Relative fold change in transcript abundance was calculated using the delta-delta Ct method by  
583 normalizing target gene expression levels to *Actb*. Primer sequences used for RT-qPCR are listed  
584 in **Table S1**.

585

586



## 587 **Bulk RNA-sequencing and analysis**

588 Poly(A)-selected RNA-seq libraries prepared using the KAPA mRNA HyperPrep Kit (Roche #  
589 08098123702) and sequenced to a depth of ~25 million read pairs per sample. Raw sequence  
590 files were filtered and their quality was assessed using FASTX-toolkit and FastQC. Filtered  
591 paired-end reads were matched to yield a file of common reads which were then pseudoaligned  
592 to the mouse (mm39) transcriptome from Ensembl release 107 (56) and quantified using Kallisto  
593 v0.45.0 (57). Resulting transcript counts were summed to gene level and differentially expressed  
594 genes were called using DESeq2 (58). Genes with < 10 TPM were filtered from the analysis.  
595 Genes with  $P$  values  $\leq 0.05$  were considered differentially expressed. A fold change cut-off of  
596  $\geq 1.5$  was used to define strongly differentially expressed genes.

597

## 598 **Single cell RNA-sequencing and analysis**

599 Raw count matrices (10X Genomics) for the 'WT' and 'cKO' mouse were imported to Seurat 4.1.0  
600 (27) and combined into one Seurat object. No explicit integration step was performed because  
601 principal component analysis indicated high initial similarity between samples. Reads were filtered  
602 to exclude cells likely to be doublets ( $nCount\_RNA < mean + one\ standard\ deviation$ ), dead or  
603 dying cells ( $nFeature\_RNA > mean - one\ standard\ deviation$ ) or high mitochondrial content  
604 ( $present.mt < mean + standard\ deviation$ ). This filtered subset was log normalized and scaled. A  
605 linear dimensional reduction was performed using principal component analysis (PCA), and 20  
606 dimensions was chosen as optimum based on inspection of Scree plots. Clusters were identified  
607 at a resolution of 0.5, and the "RunUMAP()" function was used to further investigate the dataset.  
608 Three of the initial clusters had a low number of detected molecules per cell, indicating dead or  
609 dying cells, and did not have any top genes associated with the transition from spermatogonia to  
610 elongating spermatid. Therefore, these three clusters were removed, and the data was  
611 normalized, scaled, and dimensionally reduced again using the same parameters described  
612 above.



613

#### 614 **Chromatin accessibility analysis**

615 Chromatin accessibility was assayed with 100,000 cells per sample. Libraries were prepared  
616 using the Active Motif ATAC-Seq kit (53150) according to the manufacturer's instructions except  
617 11 PCR cycles were used instead of the recommended 10 cycles. Libraries were sequenced to a  
618 depth of ~50 million paired-end 100bp reads per sample. Adapter trimming was performed using  
619 Cutadapt (59). Trimmed reads were aligned to the mouse genome (mm10) using Bowtie2 in very  
620 sensitive mode (60). Subsequent processing was performed according to the workflow previously  
621 described by Reske, Wilson (36). Regions of differential chromatin accessibility were called using  
622 *csaw* workflow "method IV" described by Reske *et al.* (2020). Briefly, reads were counted at  
623 regions corresponding to the union of peaks identified by default parameters in MACS2 for control  
624 and knockdown/knockout samples. Then, low abundance windows were filtered and a non-linear  
625 loess-based normalization method was implemented. Resulting count matrices were then  
626 subjected to *edgeR* for differential accessibility quantification.

627

#### 628 **Functional enrichment analysis**

629 GO enrichment analysis was performed using PANTHER GO annotations  
630 (<https://doi.org/10.5281/zenodo.4495804> released: February 1, 2021) at the GO Consortium  
631 website (Mi et al. 2017; <http://www.geneontology.org>). Genes considered to be expressed (i.e.,  
632 >1 TPM) in the relevant sample type were used as the reference list. GSEA was conducted as  
633 previously described using version 4.2.3 with default parameters (38, 39).

634

#### 635 **Data Availability**

636 Sequencing datasets are deposited at the NCBI Gene Expression Omnibus (GEO) repository  
637 under accession number GSE215112.

638

639 **Acknowledgments**

640 We thank P. Reddi for the gift of the ACRV1 antibody. We appreciate the technical assistance  
641 provided by Aushaq Malla, Delaney Farris, Zachary Smith, and Jake Reske, and the help from  
642 the Yale Center for Genome Analysis for high-throughput sequencing. This work was supported  
643 by funding from the National Institute of Child Health and Human Development (NICHD,  
644 R01HD098128), the Searle Scholars Program, and a Pew Scholar Award to B.J.L. B.W.W. is  
645 supported by a postdoctoral fellowship from the Hope Funds for Cancer Research.

646

647 **Author contributions**

648 Conceptualization: B.W.W., B.J.L.; Validation: B.W.W.; Formal Analysis: B.W.W., S.R.R., N.D.;  
649 Investigation: B.W.W., S.R.R., N.D., X.H., D.G.deR.; Resources: B.J.L.; Writing – Original Draft:  
650 B.W.W.; Writing – Review & Editing: B.J.L.; Visualization: B.W.W., S.R.R.; Supervision: B.J.L.;  
651 Funding acquisition: B.J.L.

652

653

## 654 Figure Legends

655 **Fig 1. Expression analysis of KDM6A in the male germline.** (A) Transcripts per million (TPM)  
656 for *Kdm6a* in the GC1-SPG cell line, primordial germ cells, whole adult testis, pachytene-enriched  
657 (PA) and round spermatid-enriched male germ cells (RS). (B) Western blotting in male germ cells  
658 for KDM6A and markers of meiotic (SYCP3) and post-meiotic (ACRV1) cells. DAZL is as a broad  
659 male germ cell marker and histone H3 is as a loading control. (C) UMAP of single cell RNA-seq  
660 (scRNA-seq) data from whole mouse testis. Distinct cell populations are indicated by the colored  
661 line. M = macrophages, T = telocytes, L = Leydig cells, \* = unassigned. (D) UMAP showing the  
662 expression pattern of *Kdm6a* across testis cell populations detected by scRNA-seq. (E) RT-qPCR  
663 in unsorted and cKIT-sorted cells derived from testes of control and *Kdm6a* cKO mice. ns = not  
664 significant, \* =  $P \leq 0.05$ , \*\* =  $P \leq 0.01$ . (F) Western blotting for KDM6A in unsorted and cKIT-  
665 sorted cells derived from testes of control and *Kdm6a* cKO mice. (G) Brightfield micrographs  
666 showing in situ hybridization for the indicated transcript (pink) in tissue sections of seminiferous  
667 tubules co-stained with hematoxylin. Dashed boxes indicate the regions captured at high  
668 magnification below. Scale bar = 50 $\mu$ m.

669

670 **Fig 2. Minimal impact on spermatogenesis in *Kdm6a* cKO mice.** (A) Gross morphology of  
671 testes from a control and a *Kdm6a* cKO mouse. Scale bar = 1 cm. (B) Testis weights from control  
672 and *Kdm6a* cKO mice normalized to body weight. (C) Cross-sections of control and *Kdm6a* cKO  
673 seminiferous tubules stained with hematoxylin and eosin. Scale bars = 50  $\mu$ m. (D) Control and  
674 *Kdm6a* cKO testis sections immunostained (green) for spermatogonia markers (LIN28A, STRA8,  
675 CHD4, and SALL4), a spermatocyte marker (SYCP3), and a broad germ cell marker (DAZL) as  
676 well as DAPI to stain DNA (blue). Scale bar = 50 $\mu$ m. (E) Whole lysates from control and *Kdm6a*  
677 cKO testes (n = 3) immunoblotted for spermatogonia markers (LIN28A, SALL4 and CHD4), a  
678 round spermatid marker (ACRV1), and a marker for meiotic progression ( $\gamma$ H2AX). Histone H3  
679 and ponceau S. serve as loading controls. (F) Immunofluorescence staining (red) for  $\gamma$ H2AX in  
680 seminiferous tubules of control and *Kdm6a* cKO mice. (G) UMAP plot of single cell RNA-seq data  
681 from control (blue) and *Kdm6a* cKO testis (pink). (H) The percentage of cells classified into each  
682 cluster out of total cells profiled in control and *Kdm6a* cKO scRNA-seq datasets. (I) Quantification  
683 of type A spermatogonia by visual examination of testes sections stained with hematoxylin and  
684 eosin. (J) Epididymal sperm counts after swim-out in control and *Kdm6a* cKO mice. (K)  
685 Coomassie-stained spermatozoa from control and *Kdm6a* cKO cauda epididymides. Scale bar =  
686 20 $\mu$ m. (L) Manual blinded quantification of abnormal heads detected by brightfield microscopy of  
687 Coomassie-stained sperm from control and *Kdm6a* cKO mice.

688

689 **Fig 3. Male germ cells depleted for KDM6A show modest changes in chromatin**  
690 **accessibility.** (A) Intersection of genomic coordinates for ATAC-seq peaks across replicates of  
691 cKIT-sorted cells from control and *Kdm6a* cKO testes. (B) MA plot for ATAC-enriched regions  
692 showing the distribution of differential chromatin accessibility in *Kdm6a* cKO cKIT+ cells. Black  
693 dots represent non-significant regions (ns) and red dots represent significant differentially  
694 accessible (DA) regions ( $p < 0.01$ ). Blue lines are loess fits to each distribution. (C) Gene feature  
695 distributions for DA regions detected in *Kdm6a* cKO cKIT+ cells. (D) Western blotting for KDM6A  
696 and histone H3 (loading control) in GC1-SPG cells expressing shScramble (shScr) or one of three  
697 different short-hairpin RNAs targeting *Kdm6a* mRNA. (E) Intersection of genomic coordinates for  
698 ATAC-seq peaks across replicates of shScr-GC1-SPGs and sh*Kdm6a*-GC1-SPGs. (F) MA plot  
699 for ATAC-enriched regions showing the distribution of differential chromatin accessibility in  
700 sh*Kdm6a*-GC1-SPGs. (G) Genome browser tracks for representative regions of chromatin

701 accessibility gain (above) and loss (below) in sh*Kdm6a*-GC1-SPGs. **(H)** Gene feature distributions  
702 for DAs detected in sh*Kdm6a*-GC1-SPGs. **(I)** Western blot for H3K27me3 and histone H3 in  
703 shScr-GC1-SPGs and sh*Kdm6a*-GC1-SPGs. **(J)** Western blot for H3K27me3 and histone H3 in  
704 unsorted and cKIT-sorted cells from control and *Kdm6a* cKO testes.

705

706 **Fig 4. KDM6A is a Transcriptional Activator in Early Spermatogenic Cells.** **(A)** Fraction of  
707 differentially expressed genes identified by scRNA-seq (scDEGs) that are downregulated and  
708 upregulated in *Kdm6a* cKO testis relative to control. **(B)** Numbers of scDEGs identified per cluster,  
709 labeled by testis cell identity. *Kdm6a* is identified as a scDEG in cluster 4, which comprises  
710 differentiated spermatogonia and early stages of meiotic prophase. **(C)** Gene ontology analysis  
711 showing terms enriched in all downregulated and upregulated scDEGs identified in *Kdm6a* cKO  
712 testes. **(D)** UMAPs showing the expression for representative downregulated scDEGs associated  
713 with chromatin organization and remodeling. Asterisks (\*) mark cells with most profound changes  
714 in expression. **(E)** Gene ontology terms enriched in scDEGs identified for clusters 4 and cluster 5  
715 i.e., cell populations spanning differentiated spermatogonia to early pachytene. **(F)** Overlap of  
716 scDEGs identified in cells classified into cluster 3 (spermatozoa) and clusters 4/5 (differentiating  
717 spermatogonia and early meiotic cells). **(G)** Heatmap showing the normalized gene expression  
718 levels in *Kdm6a* cKO testis for 25 genes that are deregulated in cluster 3, cluster 4, and cluster  
719 5.

720

721 **Fig 5. A subset of differentially expressed genes in the *Kdm6a* cKO germline is persistently**  
722 **deregulated in testes of wildtype offspring.** **(A)** Breeding scheme for the generation of *Kdm6a*  
723 cKO mice and wildtype progeny: *Kdm6a* F1 and *Kdm6a* F2. **(B)** Volcano plot showing the gene  
724 expression changes in *Kdm6a* F2 testes relative to control. **(C)** Overlap of differentially expressed  
725 genes (DEGs) detected by single cell RNA-seq (scRNA-seq) in *Kdm6a* cKO testis and DEGs  
726 identified by analysis of bulk RNA-seq of *Kdm6a* F2 testes. **(D)** Gene set enrichment analysis  
727 (GSEA) plots showing the enrichment of *Kdm6a* F1 (top) and *Kdm6a* F2 testis (bottom)  
728 expression data for all single cell DEGs (scDEGs) identified in *Kdm6a* cKO testis. The non-  
729 significant enrichment for upregulated scDEGs is shown by the GSEA plots to the right.  
730 Normalized enrichment score = NES. **(E)** Overlap of scDEGs for clusters 4 and 5 in *Kdm6a* cKO  
731 testis with the leading-edge genes (LEGs) identified by the GSEA of *Kdm6a* F1 and *Kdm6a* F2  
732 testis expression data. **(F)** Gene ontology terms enriched for leading edge genes shared between  
733 *Kdm6a* F1 and *Kdm6a* F2 gene expression datasets. **(G)** Normalized counts plotted for  
734 representative DEGs that are persistently deregulated across the germline of *Kdm6a* cKO, *Kdm6a*  
735 F1, and *Kdm6a* F2 mice.

736

737 **Fig 6. Model for intergenerational inheritance of gene regulatory states following deletion**  
738 **of *Kdm6a* in the male germline.** KDM6A is predominantly expressed during the mitotic-to-  
739 meiotic transition in the male germline where it functions as a transcriptional activator putatively  
740 through promoting permissive epigenetic states. Absence of KDM6A may alter epigenetic states  
741 to perturb gene expression. These altered gene regulatory states in *Kdm6a* cKO sperm resist  
742 reprogramming at a subset of loci upon feralization and development, resulting in perturbed  
743 transcriptional profiles in the *Kdm6a* F1 germline. Spermatogonia (SPG) and Spermatocyte  
744 (SPC).

745

746

## 747 References

- 748 1. Kuzmichev A, Nishioka K, Erdjument-Bromage H, Tempst P, Reinberg D. Histone  
749 methyltransferase activity associated with a human multiprotein complex containing the Enhancer  
750 of Zeste protein. *Genes Dev.* 2002;16(22):2893-905.
- 751 2. Cao R, Wang L, Wang H, Xia L, Erdjument-Bromage H, Tempst P, et al. Role of histone  
752 H3 lysine 27 methylation in Polycomb-group silencing. *Science.* 2002;298(5595):1039-43.
- 753 3. Boyer LA, Plath K, Zeitlinger J, Brambrink T, Medeiros LA, Lee TI, et al. Polycomb  
754 complexes repress developmental regulators in murine embryonic stem cells. *Nature.*  
755 2006;441(7091):349-53.
- 756 4. van Mierlo G, Dirks RAM, De Clerck L, Brinkman AB, Huth M, Kloet SL, et al. Integrative  
757 Proteomic Profiling Reveals PRC2-Dependent Epigenetic Crosstalk Maintains Ground-State  
758 Pluripotency. *Cell Stem Cell.* 2019;24(1):123-37.e8.
- 759 5. Mu W, Starmer J, Fedoriw AM, Yee D, Magnuson T. Repression of the soma-specific  
760 transcriptome by Polycomb-repressive complex 2 promotes male germ cell development. *Genes*  
761 *Dev.* 2014;28(18):2056-69.
- 762 6. Sakamoto M, Ito D, Inoue R, Wakayama S, Kikuchi Y, Yang L, et al. Paternally inherited  
763 H3K27me3 affects chromatin accessibility in mouse embryos produced by round spermatid  
764 injection. *Development.* 2022.
- 765 7. Kaneshiro KR, Rechtsteiner A, Strome S. Sperm-inherited H3K27me3 impacts offspring  
766 transcription and development in *C. elegans*. *Nature Communications.* 2019;10(1):1271.
- 767 8. Lesch BJ, Tothova Z, Morgan EA, Liao Z, Bronson RT, Ebert BL, et al. Intergenerational  
768 epigenetic inheritance of cancer susceptibility in mammals. *Elife.* 2019;8.
- 769 9. Siklenka K, Erkek S, Godmann M, Lambrot R, McGraw S, Lafleur C, et al. Disruption of  
770 histone methylation in developing sperm impairs offspring health transgenerationally. *Science.*  
771 2015;350(6261):aab2006.
- 772 10. Hong S, Cho YW, Yu LR, Yu H, Veenstra TD, Ge K. Identification of JmjC domain-  
773 containing UTX and JMJD3 as histone H3 lysine 27 demethylases. *Proc Natl Acad Sci U S A.*  
774 2007;104(47):18439-44.
- 775 11. Agger K, Cloos PA, Christensen J, Pasini D, Rose S, Rappsilber J, et al. UTX and JMJD3  
776 are histone H3K27 demethylases involved in HOX gene regulation and development. *Nature.*  
777 2007;449(7163):731-4.
- 778 12. Lan F, Bayliss PE, Rinn JL, Whetstone JR, Wang JK, Chen S, et al. A histone H3 lysine  
779 27 demethylase regulates animal posterior development. *Nature.* 2007;449(7163):689-94.
- 780 13. Sera Y, Nakata Y, Ueda T, Yamasaki N, Koide S, Kobayashi H, et al. UTX maintains the  
781 functional integrity of the murine hematopoietic system by globally regulating aging-associated  
782 genes. *Blood.* 2021;137(7):908-22.
- 783 14. Jiang W, Wang J, Zhang Y. Histone H3K27me3 demethylases KDM6A and KDM6B  
784 modulate definitive endoderm differentiation from human ESCs by regulating WNT signaling  
785 pathway. *Cell Res.* 2013;23(1):122-30.
- 786 15. Wang C, Lee JE, Cho YW, Xiao Y, Jin Q, Liu C, et al. UTX regulates mesoderm  
787 differentiation of embryonic stem cells independent of H3K27 demethylase activity. *Proc Natl*  
788 *Acad Sci U S A.* 2012;109(38):15324-9.
- 789 16. Lee S, Lee JW, Lee SK. UTX, a histone H3-lysine 27 demethylase, acts as a critical switch  
790 to activate the cardiac developmental program. *Dev Cell.* 2012;22(1):25-37.
- 791 17. Mansour AA, Gafni O, Weinberger L, Zviran A, Ayyash M, Rais Y, et al. The H3K27  
792 demethylase Utx regulates somatic and germ cell epigenetic reprogramming. *Nature.*  
793 2012;488(7411):409-13.
- 794 18. Dhar SS, Lee SH, Chen K, Zhu G, Oh W, Allton K, et al. An essential role for UTX in  
795 resolution and activation of bivalent promoters. *Nucleic Acids Res.* 2016;44(8):3659-74.
- 796 19. Morales Torres C, Laugesen A, Helin K. Utx is required for proper induction of ectoderm  
797 and mesoderm during differentiation of embryonic stem cells. *PLoS One.* 2013;8(4):e60020.



- 798 20. Jiang Q, Huang X, Hu X, Shan Z, Wu Y, Wu G, et al. Histone demethylase KDM6A  
799 promotes somatic cell reprogramming by epigenetically regulating the PTEN and IL-6 signal  
800 pathways. *Stem Cells*. 2020;38(8):960-72.
- 801 21. Yoo KH, Oh S, Kang K, Wang C, Robinson GW, Ge K, et al. Histone Demethylase KDM6A  
802 Controls the Mammary Luminal Lineage through Enzyme-Independent Mechanisms. *Mol Cell*  
803 *Biol*. 2016;36(16):2108-20.
- 804 22. Welstead GG, Creighton MP, Bilodeau S, Cheng AW, Markoulaki S, Young RA, et al. X-  
805 linked H3K27me3 demethylase Utx is required for embryonic development in a sex-specific  
806 manner. *Proc Natl Acad Sci U S A*. 2012;109(32):13004-9.
- 807 23. Zehir A, Benayed R, Shah RH, Syed A, Middha S, Kim HR, et al. Mutational landscape of  
808 metastatic cancer revealed from prospective clinical sequencing of 10,000 patients. *Nature*  
809 *Medicine*. 2017;23(6):703-13.
- 810 24. Greenfield A, Carrel L, Pennisi D, Philippe C, Quaderi N, Siggers P, et al. The UTX gene  
811 escapes X inactivation in mice and humans. *Hum Mol Genet*. 1998;7(4):737-42.
- 812 25. Lesch BJ, Dokshin GA, Young RA, McCarrey JR, Page DC. A set of genes critical to  
813 development is epigenetically poised in mouse germ cells from fetal stages through completion  
814 of meiosis. *Proc Natl Acad Sci U S A*. 2013;110(40):16061-6.
- 815 26. Hofmann MC, Narisawa S, Hess RA, Millán JL. Immortalization of germ cells and somatic  
816 testicular cells using the SV40 large T antigen. *Exp Cell Res*. 1992;201(2):417-35.
- 817 27. Hao Y, Hao S, Andersen-Nissen E, Mauck WM, 3rd, Zheng S, Butler A, et al. Integrated  
818 analysis of multimodal single-cell data. *Cell*. 2021;184(13):3573-87.e29.
- 819 28. Jung M, Wells D, Rusch J, Ahmad S, Marchini J, Myers SR, et al. Unified single-cell  
820 analysis of testis gene regulation and pathology in five mouse strains. *eLife*. 2019;8:e43966.
- 821 29. Guo J, Grow EJ, Mlcochova H, Maher GJ, Lindskog C, Nie X, et al. The adult human testis  
822 transcriptional cell atlas. *Cell Research*. 2018;28(12):1141-57.
- 823 30. Yoshinaga K, Nishikawa S, Ogawa M, Hayashi S, Kunisada T, Fujimoto T, et al. Role of  
824 c-kit in mouse spermatogenesis: identification of spermatogonia as a specific site of c-kit  
825 expression and function. *Development*. 1991;113(2):689-99.
- 826 31. Tsukada Y, Ishitani T, Nakayama KI. KDM7 is a dual demethylase for histone H3 Lys 9  
827 and Lys 27 and functions in brain development. *Genes Dev*. 2010;24(5):432-7.
- 828 32. Gallardo T, Shirley L, John GB, Castrillon DH. Generation of a germ cell-specific mouse  
829 transgenic Cre line, Vasa-Cre. *Genesis*. 2007;45(6):413-7.
- 830 33. Gozdecka M, Meduri E, Mazan M, Tzelepis K, Dudek M, Knights AJ, et al. UTX-mediated  
831 enhancer and chromatin remodeling suppresses myeloid leukemogenesis through noncatalytic  
832 inverse regulation of ETS and GATA programs. *Nat Genet*. 2018;50(6):883-94.
- 833 34. Xu B, Mulvey B, Salie M, Yang X, Matsui Y, Nityanandam A, et al. UTX/KDM6A  
834 suppresses AP-1 and a gliogenesis program during neural differentiation of human pluripotent  
835 stem cells. *Epigenetics & Chromatin*. 2020;13(1):38.
- 836 35. Mitchell JE, Lund MM, Starmer J, Ge K, Magnuson T, Shpargel KB, et al. UTX promotes  
837 CD8+ T cell-mediated antiviral defenses but reduces T cell durability. *Cell Reports*.  
838 2021;35(2):108966.
- 839 36. Reske JJ, Wilson MR, Chandler RL. ATAC-seq normalization method can significantly  
840 affect differential accessibility analysis and interpretation. *Epigenetics & Chromatin*.  
841 2020;13(1):22.
- 842 37. Wang SP, Tang Z, Chen CW, Shimada M, Koche RP, Wang LH, et al. A UTX-MLL4-p300  
843 Transcriptional Regulatory Network Coordinately Shapes Active Enhancer Landscapes for  
844 Eliciting Transcription. *Mol Cell*. 2017;67(2):308-21.e6.
- 845 38. Subramanian A, Tamayo P, Mootha VK, Mukherjee S, Ebert BL, Gillette MA, et al. Gene  
846 set enrichment analysis: A knowledge-based approach for interpreting genome-wide expression  
847 profiles. *Proceedings of the National Academy of Sciences*. 2005;102(43):15545-50.
- 848 39. Mootha VK, Lindgren CM, Eriksson K-F, Subramanian A, Sihag S, Lehar J, et al. PGC-  
849 1 $\alpha$ -responsive genes involved in oxidative phosphorylation are coordinately downregulated in  
850 human diabetes. *Nature Genetics*. 2003;34(3):267-73.

- 851 40. Li W, Wu J, Kim S-Y, Zhao M, Hearn SA, Zhang MQ, et al. Chd5 orchestrates chromatin  
852 remodelling during sperm development. *Nature Communications*. 2014;5(1):3812.
- 853 41. Imtiaz A, Belyantseva IA, Beirl AJ, Fenollar-Ferrer C, Bashir R, Bukhari I, et al. CDC14A  
854 phosphatase is essential for hearing and male fertility in mouse and human. *Hum Mol Genet*.  
855 2018;27(5):780-98.
- 856 42. Iwamori N, Iwamori T, Matzuk MM. H3K27 demethylase, JMJD3, regulates fragmentation  
857 of spermatogonial cysts. *PLoS One*. 2013;8(8):e72689.
- 858 43. Vogt PH, Zimmer J, Bender U, Strowitzki T. AZFa candidate gene UTY and its X  
859 homologue UTX are expressed in human germ cells. *Reprod Fertil*. 2021;2(2):151-60.
- 860 44. Wang L, Xu Z, Khawar MB, Liu C, Li W. The histone codes for meiosis. *Reproduction*.  
861 2017;154(3):R65-R79.
- 862 45. Boggs BA, Cheung P, Heard E, Spector DL, Chinault AC, Allis CD. Differentially  
863 methylated forms of histone H3 show unique association patterns with inactive human X  
864 chromosomes. *Nat Genet*. 2002;30(1):73-6.
- 865 46. Sin HS, Kartashov AV, Hasegawa K, Barski A, Namekawa SH. Poised chromatin and  
866 bivalent domains facilitate the mitosis-to-meiosis transition in the male germline. *BMC Biol*.  
867 2015;13:53.
- 868 47. Tang QY, Zhang SF, Dai SK, Liu C, Wang YY, Du HZ, et al. UTX Regulates Human Neural  
869 Differentiation and Dendritic Morphology by Resolving Bivalent Promoters. *Stem Cell Reports*.  
870 2020;15(2):439-53.
- 871 48. Shpargel KB, Sengoku T, Yokoyama S, Magnuson T. UTX and UTY demonstrate histone  
872 demethylase-independent function in mouse embryonic development. *PLoS Genet*.  
873 2012;8(9):e1002964.
- 874 49. Manna S, Kim JK, Baugé C, Cam M, Zhao Y, Shetty J, et al. Histone H3 Lysine 27  
875 demethylases Jmjd3 and Utx are required for T-cell differentiation. *Nat Commun*. 2015;6:8152.
- 876 50. Kaneshiro KR, Egelhofer TA, Rechtsteiner A, Cockrum C, Strome S. Sperm-inherited  
877 H3K27me3 epialleles are transmitted transgenerationally in cis. *Proc Natl Acad Sci U S A*.  
878 2022;119(40):e2209471119.
- 879 51. Gallardo T, Shirley L, John GB, Castrillon DH. Generation of a germ cell-specific mouse  
880 transgenic Cre line, Vasa-Cre. *genesis*. 2007;45(6):413-7.
- 881 52. Hu Y-C, de Rooij DG, Page DC. Tumor suppressor gene *Rb* is required for self-  
882 renewal of spermatogonial stem cells in mice. *Proceedings of the National Academy of Sciences*.  
883 2013;110(31):12685-90.
- 884 53. Gagnon KT, Li L, Janowski BA, Corey DR. Analysis of nuclear RNA interference in human  
885 cells by subcellular fractionation and Argonaute loading. *Nature Protocols*. 2014;9(9):2045-60.
- 886 54. Kotaja N, Kimmins S, Brancorsini S, Hentsch D, Vonesch J-L, Davidson I, et al.  
887 Preparation, isolation and characterization of stage-specific spermatogenic cells for cellular and  
888 molecular analysis. *Nature Methods*. 2004;1(3):249-54.
- 889 55. Vasiliauskaitė L, Berrens RV, Ivanova I, Carrieri C, Reik W, Enright AJ, et al. Defective  
890 germline reprogramming rewires the spermatogonial transcriptome. *Nature Structural &*  
891 *Molecular Biology*. 2018;25(5):394-404.
- 892 56. Cunningham F, Allen JE, Allen J, Alvarez-Jarreta J, Amodè MR, Armean IM, et al.  
893 Ensembl 2022. *Nucleic Acids Res*. 2022;50(D1):D988-d95.
- 894 57. Bray NL, Pimentel H, Melsted P, Pachter L. Near-optimal probabilistic RNA-seq  
895 quantification. *Nature Biotechnology*. 2016;34(5):525-7.
- 896 58. Love MI, Huber W, Anders S. Moderated estimation of fold change and dispersion for  
897 RNA-seq data with DESeq2. *Genome Biology*. 2014;15(12):550.
- 898 59. Martin M. Cutadapt removes adapter sequences from high-throughput sequencing reads.  
899 2011. 2011;17(1):3.
- 900 60. Langmead B, Salzberg SL. Fast gapped-read alignment with Bowtie 2. *Nature Methods*.  
901 2012;9(4):357-9.
- 902 61. Mi H, Huang X, Muruganujan A, Tang H, Mills C, Kang D, et al. PANTHER version 11:  
903 expanded annotation data from Gene Ontology and Reactome pathways, and data analysis tool  
904 enhancements. *Nucleic Acids Res*. 2017;45(D1):D183-d9.

## 905 Supporting Information captions

906 **S1 Figure. Characterization of scRNA-seq dataset from adult mouse testis and additional**  
907 **in situ hybridization analysis. (A)** Graph based clustering of the scRNA-seq data showing the  
908 17 distinct cell populations identified. **(B)** UMAPs of scRNA-seq data (this study) showing the  
909 expression for markers of different spermatogenic cell populations and testicular somatic cells.  
910 Note that *cKit* expression is shown to highlight the general cell populations retrieved from cKIT-  
911 sorting of whole testis **(C)** t-SNE plot showing the expression of *Kdm6a* in mouse testis using  
912 scRNA-seq data sourced from Jung et al. 2019. The authors confirmed that t-SNE and UMAP  
913 give consistent pseudotime embedding. **(D)** t-SNE plot showing the expression of *Kdm6a* in  
914 human testis using scRNA-seq data sourced from Guo et al. 2018. **(E)** Brightfield micrographs  
915 showing in situ hybridization for the indicated transcript (pink) in tissue sections of stage XII  
916 seminiferous tubules co-stained with hematoxylin. Dashed boxes indicate the regions captured at  
917 high magnification below. Scale bar = 50µm. **(F)** UMAPs showing the expression for all lysine  
918 demethylases (KDMs) detected in the scRNA-seq dataset.

919 **S2 Figure. Knockout validation and additional functional assays in *Kdm6a* cKO germ cells.**  
920 **(A)** Western blotting of whole lysates from control and *Kdm6a* cKO testes for KDM6A and histone  
921 H3 (loading control). **(B)** RT-qPCR for *Kdm7b* and the KDM6A homologs *Uty* and *Kdm6b* in cDNA  
922 samples of control and *Kdm6a* cKO testes. **(C)** Quantification of preleptotene cells by visual  
923 examination of testes sections stained with hematoxylin and eosin. **(D)** Quantification of sperm  
924 motility parameters by computer-assisted sperm analysis (CASA) in control and *Kdm6a* cKO  
925 samples under capacitated and uncapacitated conditions. ns = not significant.

926 **S3 Figure. Quality Assessment of ATAC-seq datasets. (A)** Western blotting cytoplasmic and  
927 nuclear fractions extracted from wildtype testis for KDM6A, histone H3 (nuclear marker), DDX4  
928 (cytoplasmic germ cell marker), and tubulin (cytoplasmic marker). **(B)** Signal enrichment for  
929 regions with ATAC-seq peaks at different genomic features. **(C)** Gene feature distribution of  
930 ATAC-enriched regions in control cKIT+ testis cells. **(D)** Genome browser tracks showing  
931 representative ATAC-seq peaks detected in cKIT+ testis cells at *Gapdh* (housekeeping gene) and  
932 neighboring genes. Numbers to the right represent the set scale range for each sample. **(E)** Gene  
933 feature distribution for regions with ATAC-seq peaks in shScr-GC1-SPGs. **(F)** Violin plot showing  
934 the expression levels (transcripts per million, TPM) for genes with and without ATAC-seq peaks  
935 at the promoter in shScr-GC1-SPGs. **(G)** Genome browser tracks showing representative ATAC-  
936 seq peaks at *Gapdh* and neighboring genes in GC1-SPGs. **(H)** Intersection of genome  
937 coordinates for ATAC-enriched regions in shScr-GC1-SPGs and control cKIT+ cells.

938 **S4 Figure. Validation of Transcriptome analysis in *Kdm6a* cKO testis and GC1 cell cultures.**

939 **(A)** Heatmap showing the expression of *Kdm6a* cKO testis scDEGs across control testis cells for  
940 each cluster. **(B)** Gene set enrichment analyses of bulk-RNA-seq data from *Kdm6a* cKO testes  
941 with differentially expressed genes identified by scRNA-seq (scDEGs). **(C)** Volcano plot showing  
942 the changes in gene expression detected in sh*Kdm6a*#1-GC1s. **(D)** Volcano plot showing the  
943 changes in gene expression detected in sh*Kdm6a*#2-GC1s. **(E)** Overlap of downregulated  
944 (above) and upregulated (below) DEGs identified for GC1-SPGs expressing sh*Kdm6a*#1 or  
945 sh*Kdm6a*#2. **(F)** Gene set enrichment analyses of sh*Kdm6a*#1-GC1s expression data with genes  
946 associated with differentially accessible regions of chromatin identified by ATAC-seq. Normalized  
947 enrichment score (NES). **(G)** List of DEGs detected in sh*Kdm6a*-GC1-SPGs that are shared with  
948 scDEGs from *Kdm6a* cKO testis.

949 **S5 Figure. Validation of *Kdm6a* expression status and additional gene set enrichment**  
950 **analysis in *Kdm6a* F1 and *Kdm6a* F2 testes. (A)** RT-qPCR analysis for *Kdm6a* expression



951 normalized to *Actb* in whole testis samples from control, *Kdm6a* cKO, *Kdm6a* F1, and *Kdm6a* F2  
952 mice (n =3). Errors bars = standard error of the mean. **(B)** Normalized enrichment scores from  
953 gene set enrichment analysis (GSEA) of *Kdm6a* F1 testis expression data with upregulated (red)  
954 and downregulated (blue) differentially expressed genes (scDEGs) identified for different testis  
955 cell populations in *Kdm6a* cKO mice. \* FDR q-value = < 0.05. **(C)** GSEA plots showing the  
956 enrichment of *Kdm6a* F1 and *Kdm6a* F2 testis expression data for *Kdm6a* cKO scDEGs identified  
957 for cluster 4 and cluster 5. Normalized enrichment score = NES.

958

959 **S1 Table.** Primer sequences used in this study.

960

961 **S2 Table.** Antibodies used in this study.

962

963 **S1 Dataset.** ATAC-seq peaks.

964

965 **S2 Dataset.** scRNA-seq DEGs by cluster.

966

967 **S3 Dataset.** GC1 DEGs.

968

969 **S4 Dataset.** Testis DEGs in the F1 and F2 generations.

970
